1 **A novel highly potent inhibitor of TMPRSS2-like proteases blocks SARS-CoV-2 variants of**  
2 **concern and is broadly protective against infection and mortality in mice**

3

4 Tirosh Shapira<sup>1†</sup>, I. Abrey Monreal<sup>2†</sup>, Sébastien P. Dion<sup>3</sup>, Mason Jager<sup>2</sup>, Antoine Désilets<sup>3</sup>, Andrea D.  
5 Olmstead<sup>1</sup>, Thierry Vandal<sup>3</sup>, David W. Buchholz<sup>2</sup>, Brian Imbiakha<sup>2</sup>, Guang Gao<sup>1,5</sup>, Aaleigha Chin<sup>1</sup>,  
6 William D. Rees<sup>4</sup>, Theodore Steiner<sup>4</sup>, Ivan Robert Nabi<sup>5</sup>, Eric Marsault<sup>3</sup>, Julie Sahler<sup>2</sup>, Avery August<sup>2</sup>,  
7 Gerlinde Van de Walle<sup>2</sup>, Gary R. Whittaker<sup>2</sup>, Pierre-Luc Boudreault<sup>3</sup>, Hector C. Aguilar<sup>2\*</sup>, Richard  
8 Leduc<sup>3\*</sup>, and François Jean<sup>1\*</sup>

9 † These two authors contributed equally.

10 <sup>1</sup> Department of Microbiology and Immunology, Life Sciences Institute, University of British Columbia,  
11 Vancouver, BC, V6T 1Z3, Canada

12 <sup>2</sup> Department of Microbiology and Immunology, Cornell University College of Veterinary Medicine,  
13 Ithaca, NY, 14853, USA

14 <sup>3</sup> Department of Pharmacology-Physiology, Faculty of Medicine and Health Sciences, Institut de  
15 Pharmacologie de Sherbrooke, Université de Sherbrooke, Sherbrooke, Québec, J1H 5N4, Canada

16 <sup>4</sup> Department of Medicine, BC Children's Hospital Research Institute, University of British Columbia,  
17 Vancouver, BC, V5Z 4H4, Canada

18 <sup>5</sup> Department of Cellular and Physiological Sciences, Life Sciences Institute, University of British  
19 Columbia, Vancouver, BC, V6T 1Z3, Canada

20 **\*Corresponding Authors:** Hector C. Aguilar<sup>2</sup>, Richard Leduc<sup>3</sup>, and François Jean<sup>1</sup>

21 **Email:** [ha363@cornell.edu](mailto:ha363@cornell.edu), [richard.leduc@usherbrooke.ca](mailto:richard.leduc@usherbrooke.ca), [fjean@mail.ubc.ca](mailto:fjean@mail.ubc.ca)

22

## 23 **Summary**

24 The COVID-19 pandemic caused by the SARS-CoV-2 virus remains a global public health crisis.  
25 Although widespread vaccination campaigns are underway, their efficacy is reduced against emerging  
26 variants of concern (VOCs) <sup>1,2</sup>. Development of host-directed therapeutics and prophylactics could limit  
27 such resistance and offer urgently needed protection against VOCs <sup>3,4</sup>. Attractive pharmacological targets  
28 to impede viral entry include type-II transmembrane serine proteases (TTSPs), such as TMPRSS2, whose  
29 essential role in the virus lifecycle is responsible for the cleavage and priming of the viral spike protein <sup>5-</sup>  
30 <sup>7</sup>. Here, we identify and characterize a small-molecule compound, N-0385, as the most potent inhibitor of  
31 TMPRSS2 reported to date. N-0385 exhibited low nanomolar potency and a selectivity index of  $>10^6$  at  
32 inhibiting SARS-CoV-2 infection in human lung cells and in donor-derived colonoids <sup>8</sup>. Importantly, N-  
33 0385 acted as a broad-spectrum coronavirus inhibitor of two SARS-CoV-2 VOCs, B.1.1.7 and B.1.351.  
34 Strikingly, single daily intranasal administration of N-0385 early in infection significantly improved  
35 weight loss and clinical outcomes, and yielded 100% survival in the severe K18-human ACE2 transgenic  
36 mouse model of SARS-CoV-2 disease. This demonstrates that TTSP-mediated proteolytic maturation of  
37 spike is critical for SARS-CoV-2 infection *in vivo* and suggests that N-0385 provides a novel effective  
38 early treatment option against COVID-19 and emerging SARS-CoV-2 VOCs.

39

40

41

42

43

44

45

46

## 47 **Introduction**

48 In December 2019, the first cases of coronavirus disease 2019 (COVID-19) emerged in Wuhan, Hubei  
49 Province, China, and were rapidly attributed to the etiology of a novel  $\beta$ -coronavirus, severe acute  
50 respiratory syndrome coronavirus 2 (SARS-CoV-2)<sup>9</sup>. As of May 3, 2021, more than 153 million SARS-  
51 CoV-2 infections and over 3.2 million deaths have been reported<sup>10</sup>. The approval and widespread  
52 distribution of several highly effective vaccines, along with other public health measures, now allows the  
53 possibility of controlling the COVID-19 pandemic; however, novel genetic variants of SARS-CoV-2 are  
54 emerging and spreading at alarming speed<sup>11</sup>. Importantly, vaccine effectiveness may be reduced against a  
55 number of these variants, termed *variants of concern* (VOCs)<sup>2,12,13</sup>.

56 Discovery of novel classes of antiviral compounds including both direct-acting (DAA) and host-  
57 directed (HDA) antivirals and intensive *in cellulo* and *in vivo* studies of their antiviral profiles as mono-  
58 or combination therapies against emerging SARS-CoV-2 VOCs are critical for developing preventive and  
59 therapeutic strategies to combat COVID-19<sup>6,14,15</sup>. Remdesivir is the only antiviral currently approved for  
60 clinical use against SARS-CoV-2<sup>16</sup>. Remdesivir is a DAA targeting the viral RNA-dependent RNA  
61 polymerase that catalyzes the synthesis of viral RNA<sup>17</sup>. Remdesivir is currently administered  
62 intravenously to hospitalized patients with COVID-19<sup>16</sup>. Another DAA, PF-07321332 is being developed  
63 as an oral clinical candidate. It targets the coronavirus's main protease (M<sup>pro</sup>, also called 3CL<sup>pro</sup>), an  
64 essential protease involved in processing viral replicase polyproteins<sup>18</sup>. Alternatively, host-directed  
65 antivirals (HDAs) (also called indirect-acting antivirals) are under investigation and may offer a  
66 complement to DAAs. HDAs have reduced potential for resistance by emerging SARS-CoV-2 VOCs  
67 since unlike viral genes, host genes possess a low propensity to mutate compared to viral genes<sup>5,6</sup>.  
68 Camostat mesylate (Cm), for example, is a repositioned clinical candidate for treating COVID-19 that is  
69 targeted at human type-II transmembrane serine proteases (TTSPs) such as TMPRSS2<sup>19</sup>. Cm is a broad-  
70 spectrum serine protease inhibitor used to treat pancreatitis and has demonstrated activity against TTSPs,  
71 host proteases under active investigation as therapeutic targets for COVID-19<sup>4,5</sup>. The transgenic human  
72 SARS-CoV-2 receptor (angiotensin-converting enzyme 2 [hACE2]) under a cytokeratin 18 promoter  
73 (K18); K18-hACE2) mouse model offers a stringent system for testing the efficacy of DAAs and HDAs  
74 against severe disease and mortality following SARS-CoV-2 infection<sup>20</sup>. To date, very few studies have  
75 tested antiviral efficacy in this animal model with only one DAA, a viral 3CL<sup>pro</sup> inhibitor, reported as  
76 protecting against lethal SARS-CoV-2 infection in this model<sup>21-23</sup>.

77 To date, accumulating evidence has demonstrated SARS-CoV-2 dependence on host pathways  
78 including the viral hijacking of TMPRSS2-related proteases for viral entry, suggesting that TTSPs are  
79 attractive therapeutic targets to prevent SARS-CoV-2 infection<sup>5</sup>. The SARS-CoV-2 lifecycle begins with

80 attachment and entry into respiratory epithelium via the ACE2 receptor<sup>4,9</sup>. This is mediated by the major  
81 viral surface glycoprotein, spike (S), which must undergo two sequential proteolytic cleavages by host  
82 proteases before it can mediate fusion of the virus with host cell membranes, a requirement for  
83 subsequent viral replication<sup>3,24,25</sup>. The first spike cleavage occurs at the S1/S2 site, releasing S1 and S2  
84 subunits that remain non-covalently linked, an event potentially mediated by host furin-like proteases<sup>24,25</sup>.  
85 The second cleavage occurs at the S2' site, immediately adjacent to the fusion peptide. This cleavage,  
86 which triggers the fusion event, is mediated by host TTSPs, such as TMPRSS2 and TMPRSS13, which  
87 cleave after specific single arginine or lysine residues (Arg/Lys↓)<sup>4,7,26</sup>.

88 Here, we report on the design and testing of novel small-molecule peptidomimetics for their  
89 inhibitory activity against TMPRSS2 and related TTSPs. We then investigated their broad-spectrum  
90 antiviral activity against SARS-CoV-2 and two VOCs (B.1.1.7 and B.1.351) in human cells. Last, we  
91 tested our lead highly potent antiviral, N-0385, against SARS-CoV-2-induced morbidity and mortality in  
92 K18-hACE2 mice, a model of severe COVID-19.

93

## 94 **Results**

95 **Small-molecule peptidomimetics with ketobenzothiazole warheads are potent inhibitors of**  
96 **TMPRSS2.** We previously designed first-generation peptidomimetic tetrapeptide compounds having  
97 ketobenzothiazole warheads, which demonstrated inhibitory activity against a host TTSP, matriptase<sup>27,28</sup>.  
98 These compounds act as slow tight-binding inhibitors *in vitro* but their potency in cellular systems was  
99 modest against influenza A virus<sup>28</sup>. To improve their stability and potency, we modified their N-terminus  
100 either by capping or through synthesis of desamino moieties (**Figure 1A** and **Figure S1**)<sup>29</sup>. When we  
101 measured the stability of desamino compounds, we found that they had drastically increased half-lives  
102 compared to their corresponding amine analogs (48 hr versus 2 hr, respectively, in human lung epithelial  
103 Calu-3 cells) (data not shown). Moreover, these compounds exhibited low nanomolar efficacies when  
104 tested in H1N1 models of influenza A virus infection<sup>28,30</sup>.

105 Expanding on that work here, we developed a small library of peptidomimetic compounds  
106 (**Figure 1A** and **Figure S1**) to screen for inhibition of TMPRSS2 proteolytic activity, as this TTSP is a  
107 crucial host protease involved in cleaving the SARS-CoV-2 spike and priming the virus for cell entry<sup>4</sup>.  
108 We included in this screen our first-generation tetrapeptide, N-0100<sup>28</sup>, which lacks an N-terminal  
109 stabilizing group, along with three desamino tetrapeptide analogs. We also tested four tripeptides  
110 containing different N-terminal capping groups.

111 To evaluate the efficacies of these compounds, we set up a cellular assay to measure TMPRSS2-  
112 dependant pericellular inhibition of proteolytic activity. We expressed the full-length, wild type

113 TMPRSS2 or an inactive form of the protease in which the serine residue of the catalytic triad was  
114 replaced by alanine (TMPRSS2-S441A) in Vero E6 cells. Twenty-four hr after transfection, the media  
115 was replaced for an additional 24 hr with serum-free media containing vehicle or compound in the  
116 presence of a TMPRSS2-preferred fluorogenic substrate <sup>31</sup> (**Figure 1B**). TMPRSS2-transfected cells  
117 treated with vehicle exhibited a 5-fold increase in fluorescent reporter activity compared to mock  
118 transfected cells, while TMPRSS2-S441A-expressing cells had no activity over background.

119 The peptidomimetics were tested for inhibitory activity against TMPRSS2 at 10 nM (**Figure 1B**).  
120 Camostat mesylate (Cm), which has previously been shown to be active against TMPRSS2 <sup>32</sup>, reduced  
121 substrate proteolysis by 56% compared to untreated TMPRSS2-expressing cells. The first-generation  
122 peptidomimetic, N-0100, did not inhibit TMPRSS2 activity under these conditions. However, the more  
123 stable tetrapeptides with N-terminus desamino moieties, N-0130 and N-0438, had increased inhibitory  
124 activity of 72% and 84%, respectively. N-0678 (substituting P2 Phe for the synthetic amino acid Cha)  
125 only inhibited TMPRSS2 activity by 5%. N-0676 (a tripeptide with an N-terminal Ac cap and P2 Cha)  
126 also weakly inhibited TMPRSS2 activity by 8%. N-0386 (restoring Phe in P2) resulted in more potent  
127 inhibition of 73%. N-1296 (replacing Ac with Am) had reduced potency of 16%, while N-0385 (replacing  
128 Am with Ms) resulted in a highly potent inhibition of 83%. Importantly, several peptidomimetic  
129 compounds were more efficient than Cm at reducing TMPRSS2 activity (**Figure 1B**).

130 We then investigated the dose response of the four most promising peptidomimetics (N-0130, N-  
131 0385, N-0386, and N-0438). The half-maximal inhibitory concentration (IC<sub>50</sub>) of Cm was 17.5 ± 18.8 nM,  
132 while the IC<sub>50</sub> for N-0130 was 3.1 ± 1.5 nM; for N-0438 it was 5.2 ± 5.4 nM; for N-0386 it was 3.9 ± 4.4  
133 nM; and for N-0385 it was 1.9 ± 1.4 nM (**Figure 1C** and **Table S1**). Importantly, none of the compounds  
134 affected Vero E6 cellular viability when used at 10 μM (**Figure S2**). To confirm the contribution of the  
135 ketobenzothiazole warhead to the molecule's inhibitory activity, the ketone functional group of N-0385  
136 was replaced with an alcohol group to generate N-0385(OH) (**Figure 1A**), which we predict no longer  
137 traps the target protease. No significant reduction in TMPRSS2 activity was detected when cells were  
138 treated with up to 10 μM of N-0385(OH) (**Figure 1C**), suggesting that the integrity of the  
139 ketobenzothiazole group is required to achieve potency.

140 Next, we sought to determine the selectivity profile of these inhibitors by measuring the  
141 dissociation constant  $K_i$  on selected recombinant serine proteases, including three members of the TTSP  
142 family (matriptase, hepsin, DESC1) as well as furin, thrombin, and cathepsin L. All four peptidomimetic  
143 compounds we tested behaved as low nanomolar inhibitors for the TTSPs, but they were inactive or  
144 showed only weak inhibition against the other proteases (**Figure 1D** and **Table S2**). Cm displayed a  
145 similar selectivity profile to the peptidomimetics tested, except that it demonstrated moderate inhibition of

146 thrombin ( $K_i = 621$  nM) in line with its broader spectrum properties. Overall, TTSP-targeting  
147 peptidomimetics harbouring a ketobenzothiazole warhead inhibit TMPRSS2-dependent pericellular  
148 activity in a cellular assay and preferentially inhibit other members of the TTSP family.

149 To understand the mode of binding and the main interactions of our inhibitors and how these  
150 compounds achieve their high inhibitory potential, we built a homology model of TMPRSS2 using the  
151 crystal structure of matriptase (PDB: 6N4T). Alignment of the catalytic domains demonstrated 41% and  
152 60% identity and sequence similarity, respectively, making it a reliable model, especially near the  
153 conserved binding site. Docking of N-0385 was modeled to this structure (**Figure 1E**). As predicted and  
154 recently published<sup>33</sup>, the catalytic triad Ser441 (catalytic triad: Ser441, His296, and Asp345; **Figure 1E**  
155 inlet) forms a covalent bond with the warhead ketone, thus leading to a tight-binding mode of inhibition.

156 Several key interactions can be observed in the binding pocket. As in all TTSP inhibitors  
157 possessing a guanidine group on the side-chain, a strong hydrogen bond network stabilizes this  
158 pharmacophore deep within the binding pocket (**Figure 1E**). This includes Asp435 and Gly464 as well as  
159 Gln438 via a water molecule. Gln438 is also involved in another hydrogen bond of this same water  
160 molecule to the inhibitor's glutamine ketone. This ketone also acts as a hydrogen bond acceptor with  
161 Gly462. The N-terminal mesylate forms two hydrogen bonds, one intramolecular with the terminal amide  
162 of N-0385 and another with Gly462. Finally, the oxygen of the newly formed hemiacetal is stabilized by  
163 two hydrogen bond donors from the Gly439 and Ser441 amines. A portion of the ketobenzothiazole  
164 warhead and the aromatic ring from the phenylalanine are exposed to the solvents, which could allow us  
165 to further optimize the design of this second-generation inhibitor leading to an improved pharmacokinetic  
166 profile.

167

168 **Small-molecule peptidomimetics with ketobenzothiazole warheads are potent inhibitors of SARS-**  
169 **CoV-2 entry in a lung epithelial cell line and in donor-derived human colonoids.** The peptidomimetic  
170 compounds we screened against TMPRSS2 were subsequently tested for their efficacy at preventing  
171 SARS-CoV-2 infection. Calu-3 cells were pretreated with 100 nM of the compounds for three hr prior to  
172 infection. Cells were fixed and immunofluorescently stained for dsRNA, a marker of viral replication<sup>34</sup>,  
173 and for the viral nucleocapsid, a marker of viral entry and translation<sup>35</sup> (**Figure S3**). Fluorescent high-  
174 content imaging and relative quantification of virally infected cells demonstrated consistent inhibitory  
175 profiles across dsRNA and nucleocapsid staining, which mirrored the inhibitory profile observed in the  
176 TMPRSS2 proteolytic activity assay (**Figure 2A** versus **Figure 1B**). Cm, which interferes with SARS-  
177 CoV-2 infection<sup>4</sup>, reduced infection by >83% compared to non-treated cells. N-0100, which lacks an N-  
178 terminal stabilizing moiety, reduced infection by <25%. The tetrapeptides N-0130 and N-0438, which

179 have N-terminus desamino moieties, had greatly increased antiviral activity of >93% and >88%,  
180 respectively. N-0678 (substituting P2 Phe for the synthetic amino acid Cha) inhibited SARS-CoV-2 by  
181 <23%. N-0676 (tripeptide with an N-terminal Ac cap and P2 Cha) had only moderate inhibitory activity  
182 of <53%. N-0386 (restoring Phe in P2) resulted in a highly potent SARS-CoV-2 inhibition of >99%. N-  
183 1296 (replacing Ac with Am) reduced the antiviral potency to <44%, while N-0385 (capping with Ms)  
184 restored antiviral activity to >99%. Last, N-0385(OH) (OH replacing the functional group of the  
185 warhead), demonstrated a <23% inhibition of SARS-CoV-2. Thus, TMPRSS2-inhibiting peptidomimetics  
186 are also inhibitors of SARS-CoV-2 replication and translation in Calu-3 cells; the stabilizing N-terminal  
187 caps and the ketobenzothiazole warhead are likely essential for compound stability and antiviral potency.

188 Compounds significantly inhibiting SARS-CoV-2 (>75%) in the antiviral screen were further  
189 validated and characterized using a dose response analysis in Calu-3 cells (**Figure S3**). The half-maximal  
190 effective dose (ED<sub>50</sub>) of Cm was 10.6 ± 8.4 nM, while the ED<sub>50</sub> for N-0130 was 30.1 ± 30.1 nM; for N-  
191 0438 it was 35.7 ± 24.5 nM; for N-0386 it was 2.3 ± 1.7 nM; and for N-0385 it was 2.8 ± 1.4 nM (**Figure**  
192 **2B**). An ED<sub>50</sub> value could not be determined for N-0385(OH) as significant inhibition was not observed at  
193 concentrations up to 1 μM (**Figure 2B**). These compounds did not exhibit any toxicity; all four  
194 compounds had half-maximal cytotoxic concentration (CC<sub>50</sub>) values of >1 mM in Calu-3 cells (**Table**  
195 **S1**). Thus, the selectivity index (SI) for these compounds (N-0130, N-0438, N-0386, and N-0385) was  
196 between 8.97 X10<sup>4</sup> and 2.75 X10<sup>6</sup> (**Table S1**). Overall, these results confirm that two newly discovered  
197 TTSP-targeted peptidomimetic compounds (N-0386 and N-0385) are extremely potent low nanomolar  
198 inhibitors of SARS-CoV-2 infection in human lung epithelial cells.

199 We next examined the impact of Cm, N-0385, and N-0385(OH) on the extracellular release of  
200 SARS-CoV-2 infectious virions from Calu-3 cells. Two effective doses (40 nM and 200 nM) from the  
201 ED<sub>50</sub> curve-fitting (**Figure 2B**) were selected for plaque assays. The cell supernatant from Cm-treated and  
202 infected cells demonstrated a 1-log reduction in the presence of 40 nM compared to the DMSO-treated  
203 infected control and a 2-log reduction with 200 nM Cm (**Figure 2C**). In comparison, both 40 nM and 200  
204 nM treatments with N-0385 reduced viral titers by >2.5-log. Consistent with previous results, N-  
205 0385(OH) did not exhibit a significant reduction in SARS-CoV-2 plaques at 40 nM or 200 nM. These  
206 results confirm that N-0385, which targets TMPRSS2, is a potent inhibitor of SARS-CoV-2 infectivity in  
207 Calu-3 cells and that the ketobenzothiazole warhead is required for N-0385 antiviral potency.

208 Although Calu-3 cells represent a scalable and clinically relevant system of antiviral screening for  
209 SARS-CoV-2 inhibitors, they are an immortalized cell line<sup>36</sup>. To evaluate the effectiveness of N-0385 in  
210 a primary human cell-based model, we explored SARS-CoV-2 infection in donor-derived human  
211 colonoids<sup>37,38</sup>. SARS-CoV-2 initially causes a respiratory infection but many infected individuals also

212 experience gastrointestinal symptoms frequently linked with increased disease duration and severity<sup>39,40</sup>.  
213 We first investigated the susceptibility of colonoid monolayers<sup>37</sup> to SARS-CoV-2 infection. Consistent  
214 with previous work, the colonoids were susceptible to infection as evidenced by dsRNA and nucleocapsid  
215 staining (**Figure 2D** and **Figure S4**)<sup>39,40</sup>.

216 N-0385 and N-0385(OH) were then tested for their efficacy at preventing SARS-CoV-2 infection  
217 in colonoids. The colonoids were pretreated with 100 nM of the compounds for 3 hr prior to 3-day  
218 infection with SARS-CoV-2. Under these conditions, N-0385-pretreated colonoids had undetectable  
219 infection compared to DMSO-treated colonoids (>99% inhibition) (**Figure 2D**). In contrast, N-0385(OH)  
220 did not significantly reduce SARS-CoV-2 infection in this system (<20% inhibition) (**Figure 2D**). These  
221 results align with observations in Calu-3 cells and confirm the nanomolar potency of N-0385 against  
222 SARS-CoV-2 in primary human cells.

223

224 **N-0385 is a nanomolar, broad-spectrum coronavirus inhibitor of SARS-CoV-2 VOCs including**  
225 **B.1.1.7 and B.1.351.** To our knowledge, mutations in the TMPRSS2 cleavage site have not been  
226 identified in SARS-CoV-2 variants, suggesting that that N-0385 should retain high potency against  
227 SARS-CoV-2 VOCs<sup>12</sup>. First, we confirmed infectivity of two VOCs in Calu-3 cells: B.1.1.7 (originally  
228 identified in the United Kingdom) and B.1.351 (first identified in South Africa). Confocal imaging of  
229 infected cells confirmed infectivity of these variants as demonstrated by nucleocapsid and dsRNA  
230 staining (**Figure 3A**). We then evaluated the efficacy of N-0385 for preventing SARS-CoV-2 VOC  
231 infection in Calu-3 cells. The ED<sub>50</sub> of N-0385 against the VIDO-01 isolate was 5.2 nM under these  
232 conditions while the ED<sub>50</sub> against B.1.1.7 was 3.4 nM and against B.1.351 it was 13.1 nM (**Figure 3B**).  
233 Statistical analysis confirmed that compared to the VIDO-01 isolate, there was no difference in  
234 effectiveness of N-0385 against the B.1.1.7 variant; however, there was a significant difference of N-0385  
235 against the B.1.351 variant in Calu-3 cells. In both cases, N-0385 retained low nanomolar potency against  
236 both VOCs. This underlines the potential of N-0385 to act as a broad spectrum, host-directed antiviral  
237 against emerging SARS-CoV-2 VOCs.

238

239 **N-0385 prevents SARS-CoV-2-induced morbidity and mortality in a mouse model of infection.**

240 After establishing the efficacy of N-0385 *in vitro* and *in cellulo*, we tested whether intranasal  
241 administration would be protective *in vivo*, using K18-hACE2 mice expressing the human ACE2 receptor  
242 driven by a keratin promoter<sup>41,42</sup>, an established mouse model of severe SARS-CoV-2 disease<sup>43</sup>. K18-  
243 hACE2 mice express the human ACE2 receptor driven by a keratin promoter<sup>41,42</sup>. In the first experiment,  
244 ten mice per group (five female and five male) were administered a single daily intranasal dose of 7.2



245 mg/kg N-0385, N-0385(OH), or a vehicle control (0.9% saline) for eight days from day -1 to day 6  
246 relative to infection. The mice were challenged on day 0 with  $1 \times 10^3$  PFU/mouse of SARS-CoV-2  
247 (**Figure 4A**). Weight loss and survival data indicate that mice receiving N-0385 exhibited greatly reduced  
248 morbidity and mortality compared to untreated mice (**Figure 4B-E**). N-0385-treated mice exhibited lower  
249 weight loss (average 3%) and greater survival (70%) in stark contrast with N-0385(OH)- or saline-treated  
250 mice, which had significantly greater weight loss (average ~14% for both) and poor survival (10% and  
251 0%, respectively).

252         Histological examination of lung tissue revealed mild pathology in the majority of SARS-CoV-2  
253 infected mice, with mild perivascular and interstitial inflammatory infiltrates as the predominant change,  
254 irrespective of treatment group (**Table S3**). Saline-treated mice frequently had additional histological  
255 changes including alveolar edema, alveolar fibrin, and inflammatory cells within alveoli. Of the mice that  
256 survived up to the study endpoint, three had focal areas of fibrosis, type II pneumocyte hyperplasia, and  
257 occasionally lymphoid hyperplasia. However, the majority of the mice that survived showed little to no  
258 pathological signs in the lungs (**Figure 4F**). Histologic lesions in the brain included multifocal  
259 perivascular cuffs of inflammatory cells, reactive glial cells, neutrophils, and lymphocytes in the adjacent  
260 neuroparenchyma (gliosis), infiltration of the meninges with inflammatory cells, and neuronal necrosis  
261 characterized by shrunken neuron bodies with hypereosinophilic cytoplasm and pyknotic or karyorrhectic  
262 nuclei. No lesions were observed in the brains of mice that survived to the study endpoint (**Figure 4G** and  
263 **Table S3**).

264         Immunohistochemistry of the SARS-CoV-2 nucleocapsid protein revealed significant amounts of  
265 the viral antigen throughout the brain and lungs of infected mice treated with saline or N-0385(OH)  
266 (**Figure 5** and **Table S4**). Antigen was detected in the brain, the lung, or both tissues for most of the  
267 infected mice (**Figure 5** and **Table S4**). The amount of antigen detected in the brain and lung was reduced  
268 significantly or completely absent in mice treated with N-0385 that survived to the study endpoint  
269 (**Figure 5** and **Table S4**).

270         We then evaluated the outcome of a shortened regimen using ten mice per group treated with N-  
271 0385 or saline from day -1 to day 2 relative to infection (**Figure 6A**). The N-0385-treated mice in this  
272 group showed 100% survival compared to 20% survival in the control group, while the treated group had  
273 an average 2% weight gain compared to average 14% weight loss in the control group (**Figure 6B-D**).  
274 Combined, all *in vivo* data strongly indicate that N-0385 significantly prevents morbidity and mortality in  
275 the K18-hACE2 mouse model of severe SARS-CoV-2 disease, even when treatment was limited to early  
276 infection.

277

## 278 **Discussion**

279 In the present study, we report on N-0385, the most potent small-molecule protease inhibitor of  
280 human TMPRSS2 and the first broad-spectrum nanomolar coronavirus HDA of SARS-CoV-2 VOCs. N-  
281 0385 acts as an inhibitor of the TTSP-dependent proteolytic activation of virus spike protein, a critical  
282 step to permitting viral-cell membrane fusion and entry into target cells <sup>4</sup>. The nanomolar potency of N-  
283 0385 against SARS-CoV-2 infection in human Calu-3 cells and patient-derived colonoids without  
284 detectable toxicity yields a striking selectivity index of  $>10^6$ . Furthermore, in the K18-hACE2 mouse  
285 model, treating with N-0385 resulted in complete protection against SARS-CoV-2 induced mortality,  
286 suggesting that N-0385 may provide a novel effective early treatment option against emerging SARS-  
287 CoV-2 VOCs.

288 We had previously shown how peptidomimetic-based compounds having ketobenzothiazole  
289 warheads exhibited potent antiviral efficacy at impeding influenza A H1N1 virus infection of Calu-3 cells  
290 through inhibition of TTSPs <sup>28</sup>. The activation of the influenza A virus surface glycoprotein  
291 hemagglutinin is strikingly similar to that of the SARS-CoV-2 spike in that both are viral surface protein  
292 homotrimers cleaved by proteolytic enzymes of the TTSP family that are expressed by host epithelial  
293 cells <sup>14,44</sup>. TTSPs are attractive broad-spectrum, host-directed antiviral drug targets because of (i) their  
294 important role in mediating viral entry <sup>5</sup>; (ii) their accessibility on the surface of nasal and pulmonary  
295 epithelial cells <sup>45,46</sup>; and (iii) their demonstrated therapeutic potential for combating medically important  
296 viruses such as SARS-CoV-2 and other human coronaviruses as well as influenza viruses <sup>14,44,47</sup>.

297 In this work, we present the design and use of small molecule peptidomimetics with  
298 ketobenzothiazole warheads, which led to the identification of N-0385, a compound with potent  
299 inhibitory activity against TMPRSS2 proteolytic activity ( $IC_{50} = 1.9$  nM). When we screened selected  
300 TMPRSS2 inhibitors for antiviral activity against SARS-CoV-2, a similar inhibitory profile was observed  
301 against TMPRSS2 expressed in Vero E6 cells compared to SARS-CoV-2 infection in Calu-3 cells. N-  
302 0385, the lead antiviral candidate, demonstrated potent inhibition of SARS-CoV-2 infection in Calu-3  
303 cells, with an  $ED_{50}$  of  $2.8 \pm 1.4$  nM and a SI of  $> 1 \times 10^6$ . The potency of this compound was validated  
304 using two viral biomarkers of intracellular infection as well as by measuring release of infectious viral  
305 particles. Further, complete inhibition of infection was achieved with 100 nM N-0385 in colonoids  
306 derived from human donors confirming the low nanomolar potency of N-0385 against SARS-CoV-2. To  
307 date, GC-376, a DAA targeting 3CL<sup>pro</sup>, is the only other lead antiviral candidate for SARS-CoV-2 for  
308 which a comparable SI to N-0385 has been reported in bioRxiv <sup>48</sup>.

309 The usefulness of N-0385 needs to be envisaged in the context of the currently circulating SARS-  
310 CoV-2 variants. For example, B.1.1.7 and B.1.351 are of concern because of their rapid rise to dominance

311 as well as their extensive spike mutations, which could lead to conformational changes of the trimeric  
312 spike structure, which may be detrimental to antiviral effectiveness and vaccine protection<sup>2,12,49</sup>. We  
313 speculate that N-385 inhibitory efficacy against these two SARS-CoV-2 VOCs should not be  
314 compromised since no mutations in the TMPRSS2 cleavage site have been reported for these two SARS-  
315 CoV-2 VOCs<sup>12</sup>. Our results confirmed the broad-spectrum nanomolar antiviral activity of N-0385 against  
316 SARS-CoV-2 B.1.1.7 and B.1.351 in human cells.

317 Recent studies have shown that the K18-hACE2 mouse model used in our studies is an ideal  
318 model to recapitulate severe human COVID-19 pathology, high morbidity and mortality. SARS-CoV-2  
319 challenge in this model leads to high viral titers in lung and brain tissues with commensurate high  
320 morbidity and mortality and cytokine/chemokine production<sup>41,50</sup>. Therefore, this model is ideal for testing  
321 SARS-CoV-2 therapeutics due to its severe disease burden, as compared to other animal models including  
322 mouse-attenuated SARS-CoV-2 in wild-type mice or wild-type SARS-CoV-2 in golden Syrian hamsters,  
323 which exhibit milder symptoms. Protection in an animal model with high levels of hACE2, such as the  
324 K18-hACE2 mouse model, is thus indicative of the high promise of anti-SARS-CoV-2 antivirals<sup>41</sup>.

325 N-0385 significantly reduced morbidity and mortality in the K18-hACE2 mouse model of severe  
326 human COVID-19 pathology, following intranasal administration. To maximize potential antiviral  
327 efficacy, we first investigated the protective effect of an eight-day N-0385 treatment regimen, which  
328 protected 70% of the mice from SARS-CoV-2 induced mortality. Subsequently, we investigated a  
329 shortened early treatment regimen and observed 100% survival of these mice, underlining the potent  
330 antiviral efficacy of N-0385 and the importance of the TTSP-mediated proteolytic maturation of spike  
331 protein for SARS-CoV-2 infection *in vivo*. In addition to the reduced mortality, morbidity, and  
332 histological signs, immunohistochemical analysis indicated a significant reduction of SARS-CoV-2  
333 nucleocapsid protein in the lungs and brain in the mice that survived. This is indicative of the effective  
334 reduction of virus propagation in both organ types in this animal model. While further studies are needed  
335 to understand the ideal time points for N-0385 administration to sufficiently reduce viral  
336 entry/propagation *in vivo*, N-0385 shows a greater-than-60% reduction in the proportion of SARS-CoV-2  
337 infected cells in the lungs of infected mice, as indicated by IHC staining (day 6-8 post-infection). Our  
338 findings suggest that a single daily intranasal delivery of N-0385 can provide a novel effective early  
339 treatment option for COVID-19.

340 A number of lead antiviral candidates for SARS-CoV-2 infection are under investigation in  
341 clinical trials and in animal models but to date only one study on the DAA GC-376 has reported  
342 protection against lethal SARS-CoV-2 infection in the K18-hACE2 model<sup>23</sup>. Plitidepsin, a newly  
343 discovered naturally occurring HDA protected against lung pathology in the K18-hACE2 model;

344 however, the effect on mortality was not reported <sup>21</sup>. Plitidepsin is a promising HDA, which targets the  
345 ubiquitously expressed elongation factor 1-alpha 1 and has demonstrated high potency ( $ED_{50} = 1.62$  nM  
346 and  $SI = 40.4$ ) against SARS-CoV-2 infection in pneumocyte-like cells <sup>21</sup>. Cm and nafamostat mesylate  
347 are also HDAs targeting serine proteases, including host TTSPs, that are undergoing human trials against  
348 SARS-CoV-2; however, no significant protection against infection was observed in the adenovirus  
349 hACE2 model (Cm) or hamster model (nafamostat mesylate) of SARS-CoV-2 infection <sup>4,51,52</sup>. Recently  
350 reported clinical trial data for Cm treatment of hospitalized COVID-19 patients demonstrated a lack of  
351 impact on time to recovery and incidence of death following SARS-CoV-2 infection <sup>19</sup>. Antivirals will  
352 likely need to be administered during the very early phase of COVID-19 to be effective in lowering the  
353 risk of disease progression, consistent with our short early treatment regimen in K18-hACE2 mice  
354 infected with SARS-CoV-2.

355 Overall, we have developed and characterized N-0385, a novel highly potent inhibitor of  
356 TMPRSS2-like proteases that blocks SARS-CoV-2 VOCs and is broadly protective against infection and  
357 mortality in mice. In addition, we demonstrated that N-0385 provides a novel effective early treatment  
358 option against emerging SARS-CoV-2 VOCs. Further, N-0385 analogs may have broader applications in  
359 combating other widespread respiratory viruses that usurp TMPRSS2-related proteases for viral entry,  
360 including other established coronaviruses, influenza viruses, and other viruses that depend on TTSPs for  
361 entering host cells <sup>4,30,44</sup>. We envision a practical use of N-0385 for unvaccinated individuals or those with  
362 high risk of exposure or severe disease outcome related to SARS-CoV-2 VOCs and future emerging  
363 pathogens.

364  
365

## 366 **Materials and Methods**

367

368 **Cell lines, antibodies, and inhibitors.** Calu-3 cells (ATCC® HTB-55™) were cultivated according to  
369 ATCC recommendations. All experiments were performed in these cells below passage 6. Vero E6 cells  
370 (ATCC® CRL-I1586™; used for SARS-CoV-2 plaque assay) were cultivated in MEM supplemented with  
371 10% FBS, 1 mM sodium pyruvate, and 0.1 nM non-essential amino acids and used at passage 19-25. All  
372 cells were expanded in a T75 flask with 5% carbon dioxide at 37°C. Cell density was kept between 0.25  
373 and 2 million cells/mL. Camostat mesylate was obtained from MilliporeSigma. The SARS-CoV-2  
374 nucleocapsid antibody [HL344] (GTX635679) was kindly provided by Genetex; mouse anti-dsRNA  
375 antibody (J2-1904) was purchased from Scions English and Scientific Consulting<sup>34</sup>; Hoechst 33258 and  
376 secondary antibodies goat anti-mouse IgG Alexa Fluor 488 (A11001) and goat anti-rabbit IgG Alexa  
377 Fluor 555 (A21428) were obtained from Invitrogen.

378

379 **Peptidomimetic compound synthesis.** Preparation of the compounds using a mixed approach of solution  
380 and solid phase synthesis is described in the supplementary materials, in addition to a synthetic scheme of  
381 analogues, NMR, HRMS, UPLC-MS retention time, structure, purity, and molecular formula strings of  
382 compounds. Amino acids and coupling reagents were obtained from Chem-Impex International (USA)  
383 and used as received. All other reagents and solvents were purchased from Sigma-Aldrich (Canada) or  
384 Fisher Scientific (USA). Tetrahydrofuran (THF) was dried over sodium benzophenone ketyl; DCM over  
385 P2O5; methanol over magnesium. Celite (AW Standard Super-Cel® NF) was obtained from Sigma-  
386 Aldrich (Canada). Thin layer chromatography was carried out on glass plates covered with silica gel (250  
387 µm) 60 F-254 (Silicycle). Flash chromatography was carried out with Silicaflash® P60 (40-63 µm,  
388 Silicycle). Chlorotriyl chloride (CTC) resin was obtained from Matrix Innovation and generally used with  
389 a loading of 1.2 mmol/g. Reactions on resin were conducted in 60 mL polypropylene cartridges (obtained  
390 from Applied Separations) and Teflon stopcocks. Reactors were gently rocked on an orbital shaker at 172  
391 rpm during solid phase chemistry. The resin was washed with the indicated solvent for 2-5 min with 10  
392 mL solvent per gram of resin. Purity was analyzed on a Waters UPLC H-Class with UV detection PDA  
393 equipped with an Acquity UPLC CSH C18 1.7 µm 2.1 x 50 mm<sup>2</sup> column. MS spectra were recorded on a  
394 Waters SQD 2 detector (electrospray) instrument with a linear gradient of 5-95% CH<sub>3</sub>CN and H<sub>2</sub>O  
395 containing 0.1% formic acid. Final products were purified to >95% purity (UPLC-UV) using a Waters  
396 Preparative LC (Sample Manager 2767 (fraction collector); Binary gradient module 2545, with two 515  
397 HPLC pumps and a system fluidics organizer (SFO); Photodiode Array Detector 2998: column X Select  
398 CSH Prep C18 5 µm OBD 19 x 250 mm<sup>2</sup> column; buffer: A: 0.1% HCOOH in H<sub>2</sub>O; B: 0.1% HCOOH in

399 ACN; flow 20 mL/min). The gradient was 10-60% of acetonitrile at a flow rate of 20 mL/min. Purities of  
400 all compounds in this paper were >95% as assessed by UPLC.

401

402 **Molecular modeling.** A homology model of TMPRSS2 catalytic domain was built using the structure of  
403 matriptase (PDB: 6N4T) with the “Homology Model” module of the Molecular Operating Environment  
404 (MOE) from the Chemical Computing Group. Sequence alignment of catalytic domains of matriptase  
405 with TMPRSS2 using “Align Sequences Protein BLAST” and MOE sequence alignment allowed  
406 building of a high-quality model. Ten models were created, and the final model was selected using the  
407 best score obtained by the generalized-born volume integral/weighted surface area (GBVI/WSA) scoring  
408 method<sup>53</sup>. The final model was refined and minimized using the Amber10:Extended Huckel Theory  
409 (EHT) force field. After drawing the structure, all protein-ligand complexes were prepared using the  
410 Protonate 3D tool; then the partial charges were calculated and the ligands were energy-minimized.

411 Molecules were docked in the protein-binding site with the software MOE2019.01.02. All atoms were  
412 fixed, and the ligands were allowed to be flexible. The carbon of the ketone making the reversible  
413 covalent bond with the protein was fixed at  $3.0 \pm 0.1$  Å of the catalytic serine to constrain the position of  
414 the ketobenzothiazole group within the binding site. The guanidine of the Arg in P1 was also fixed via  
415 two key interactions in the binding site. Conformational search using LowModeMD was made with  
416 AMBER10:EHT as a molecular mechanics force field with default parameters (rejection limit: 100; RMS  
417 gradient: 0.05; conformation limit: 10000 and iteration limit: 10000). Finally, a second round of energy  
418 minimization was performed around the ligand-binding site. The low energy conformations of the  
419 inhibitor-protein complexes were analysed for their binding interactions.

420

421 **TMPRSS2 pericellular activity screening assay and IC<sub>50</sub> determination.** Vero E6 cells were  
422 transfected with mock (pcDNA3.1), TMPRSS2 (pcDNA3.1/TMPRSS2 Uniprot: O15393-1), or  
423 TMPRSS2-S441A (pcDNA3.1/TMPRSS2-S441A) using Lipofectamine 3000 in 12-well plates. After 24  
424 hr transfection, cells were washed with PBS and media replaced with HCell-100 media containing 200  
425 µM Boc-QAR-AMC and either vehicle (0.01% DMSO) or compounds at the indicated concentration for  
426 24 hr. To measure proteolytic activity, 90 µL of cell media was transferred to a black 96-well plate, and  
427 fluorescence was measured at room temperature (excitation: 360 nm, emission: 460 nm) using a FLx800  
428 TBE microplate reader (Bio-Tek Instruments). Proteolytic activities are presented as percentage of  
429 activity relative to vehicle-treated cells (screen at 10 nM) or in raw fluorescence units (IC<sub>50</sub> curves). IC<sub>50</sub>  
430 values were determined after generating a nonlinear regression analysis from a log([Compound]) versus a  
431 proteolytic activity plot using GraphPad Prism software (version 9.0.1). GraphPad Prism was used to

432 identify and eliminate outliers ( $Q = 1$ ) and assess the goodness of the fits.  $IC_{50}$  values presented are the  
433 mean  $\pm$  standard deviation (SD) of at least three independent experiments.

434

435 **SARS-CoV-2 infection and treatment in Calu-3 lung epithelial cells.** All infections were carried out in  
436 a Biosafety Level 3 (BSL3) facility (UBC FINDER) in accordance with the Public Health Agency of  
437 Canada and UBC FINDER regulations (UBC BSL3 Permit # B20-0105 to FJ). SARS-CoV-2 (SARS-  
438 COV-2/Canada/VIDO-01/2020) was kindly provided by Dr. Samira Mubareka (Sunnybrook, ONT,  
439 Canada). SARS-CoV-2 VOCs (B.1.1.7 and B.1.351) were kindly provided by Dr. Mel Krajden (BC  
440 Centre for Disease Control, BC, Canada). Viral stocks were made in Vero E6 cells<sup>54</sup>. For experiments,  
441 passage three of the virus was used with a determined viral titer of  $1.5 \times 10^7$  plaque forming units  
442 (PFU)/mL. Calu-3 cells were seeded at a concentration of 10,000 cells/well in 96-well plates the day  
443 before infection. SARS-CoV-2 stocks were diluted in cell-specific media to a multiplicity of infection  
444 (MOI) of 2. Cells were pretreated with compounds for three hr and then incubated with the virus for two  
445 days, followed by fixation of the cells with 3.7% formalin for 30 min to inactivate the virus. The fixative  
446 was removed, and cells were washed with PBS, permeabilized with 0.1% Triton X-100 for 5 min and  
447 blocked with 1% Bovine serum albumin (BSA) for 1 hr, followed by immunostaining with the mouse  
448 primary antibody J2 (dsRNA) and rabbit primary antibody HL344 (SARS-CoV-2 nucleocapsid) at  
449 working dilutions of 1:1000 for 1 hr at room temperature. Secondary antibodies were used at a 1:2000  
450 dilution and included the goat anti-mouse IgG Alexa Fluor 488 and goat anti-rabbit IgG Alexa Fluor 555  
451 with the nuclear stain Hoechst 33342 at 1  $\mu$ g/mL and F-actin staining with Alexa Fluor 647 phalloidin at  
452 a 1:300 dilution for 1 hr at room temperature in the dark. After washing with PBS, plates were kept in  
453 dark at 4°C until imaging on a high content screening (HCS) platform (CellInsight CX7 HCS, Thermo  
454 Fisher Scientific) with a 10X objective, or a EVOS™ M7000 Imaging System (Thermo Fisher Scientific)  
455 with a 20X or 40X objective. Confocal imaging was performed with a Leica TCS SP8 STED 3 $\times$  laser  
456 scanning confocal microscope (Leica, Wetzlar, Germany) equipped with a 100 $\times$ /1.4 Oil HC PL APO CS2  
457 STED White objective, a white light laser, HyD detectors, and operated with a Leica Application Suite X  
458 (LAS X) software.

459

460 **High-content screening of SARS-CoV-2 infection.** Monitoring of the total number of cells (based on  
461 nuclei staining) and number of virus-infected cells (based on dsRNA and nucleocapsid staining) was  
462 performed using the CellInsight CX7 HCS platform (Thermo Fisher), as previously described<sup>55,56</sup>.  
463 Briefly, nuclei are identified and counted using the 350/461 nm wavelength (Hoechst 33342); cell debris  
464 and other particles are removed based on a size filter tool. A region of interest (ROI, or “circle”) is then

465 drawn around each host cell and validated against the bright field image to correspond with host cell  
466 membranes. The ROI encompasses the “spots” where dsRNA (485/521 nm wavelength) and SARS-CoV-  
467 2 nucleocapsid (549/600 nm wavelength) are localized. Finally, the software (HCS Studio Cell Analysis  
468 Software, version 4.0) identifies, counts, and measures the pixel area and intensity of the “spots” within  
469 the “circle.” The fluorescence measured within each cell (circle) is then added and quantified for each  
470 well. The total circle spot intensity of each well corresponds to intracellular virus levels ( $Z' > 0.7$ ) and is  
471 normalized to non-infected cells and to infected cells with 0.1% DMSO. Nine fields were sampled from  
472 each well. Nuclei stain (Hoechst 33342) was also used to quantify cell loss (due to cytotoxicity or loss of  
473 adherence) and to verify that the changes in viral infection did not result from a decrease in cell numbers.

474

475 **Median effective dose (ED<sub>50</sub>) curves.** Intracellular dose response (ED<sub>50</sub> values) for selected compounds  
476 against SARS-CoV-2 were determined by pretreating Calu-3 cells for three hr with serially diluted  
477 compounds (0.064, 0.32, 1.6, 8, 40, 200, and 1000 nM), followed by SARS-CoV-2 infection for 48 hr.  
478 Viral infection was detected by staining for dsRNA or nucleocapsid signal and quantified as described in  
479 Section 4.6. ED<sub>50</sub> experiments were repeated at least three times for each compound with three technical  
480 replicates in each experiment. Intracellular nucleocapsid levels were interpolated to negative control  
481 (0.1% DMSO, no infection) = 0, and positive control (0.1% DMSO, with infection) = 100. The GraphPad  
482 Prism 9™ (GraphPad Software, Inc.) nonlinear regression fit modeling variable slope was used to  
483 generate a dose-response curve [ $Y = \text{Bottom} + (\text{Top}-\text{Bottom})/(1+10^{((\text{LogIC}_{50}-X)*\text{HillSlope})})$ ],  
484 constrained to top = 100, bottom = 0.

485

486 **SARS-CoV-2 plaque assay.** A total of 250,000 Vero E6 cells were seeded in complete MEM medium in  
487 6-well plates and incubated for 24 hr at 37°C prior to infection with a 1:1000 dilution of supernatant from  
488 mock, infected, and treated and infected cells. The wells were washed once with PBS before 100 µL virus  
489 dilution was added per well in quadruplicate. Infected cells were incubated at 37°C for 1 hr, mixing  
490 gently every 15 min, then covered with 2 mL overlay medium of 2% Avicel CL-611 (DuPont Pharma  
491 Solutions) diluted 1:1 with 2x minimum essential media (Gibco). The cells were then incubated for three  
492 days. To fix the cells, 2 mL 8% formalin was added to each well for 30 min, following removal of the  
493 Avicel/formalin solution. Cells were gently washed with 1 mL tap water/well, followed by staining with  
494 200 µL 1% crystal violet for 5 min. Crystal violet was removed, and the cells were washed three times  
495 with 1 mL tap water/well, then dried before the viral plaques were manually counted.

496



497 **Cytotoxicity assays.** Calu-3 and Vero E6 cells (2500 or 10,000 cells for samples, 80-20,000 cells for  
498 standard curve) were seeded in 96-well plates. Following a 24-hr incubation at 37°C 5% CO<sub>2</sub>, cells were  
499 washed with D-PBS and compounds added (10 μM) for an additional 24-hr incubation. Cellular viability  
500 was assessed using Cell Titer-Glo® 2.0 Cell Viability Assay (Promega) according to the manufacturer's  
501 instructions. The number of viable cells was extrapolated using the standard curve. Cellular viability in  
502 Vero E6 cells was expressed relative (%) to vehicle-treated cells. Data are from four independent  
503 experiments (mean ± SD).

504  
505 **Protease selectivity of N-0385.** Recombinant human matriptase, hepsin, and DESC1 were expressed and  
506 purified as described previously<sup>57,58</sup>. Recombinant human furin, human cathepsin L (Bio-technie), and  
507 human thrombin (MilliporeSigma) were obtained from commercial sources. Dissociation constants ( $K_i$ )  
508 were determined using steady-state velocities as previously reported<sup>27,29</sup>. Assays were performed at room  
509 temperature in assay buffers (50 mM Tris-HCl pH 7.4; 150 mM NaCl; 500 μg/ml BSA for matriptase,  
510 hepsin, DESC1 and thrombin; 50 mM HEPES pH 7.4, 1 mM β-mercaptoethanol, 1 mM CaCl<sub>2</sub>, 500 μg/ml  
511 BSA for furin; 50 mM MES ph 6, 5 mM DTT, 1 mM EDTA, 0.005% Brij 35, 500 μg/ml BSA for  
512 Cathepsin L). To measure proteolytic activity, protease (0.25 to 1 nM) was added to the assay buffer  
513 containing different concentrations of compounds and a fluorogenic substrate (Boc-RVRR-AMC for  
514 furin, Z-LR-AMC for cathepsin L, and Boc-QAR-AMC for the other proteases). Activity was monitored  
515 (excitation: 360 nm; emission: 460 nm) using a FLx800 TBE microplate reader (Bio-Tek Instruments). If  
516 substantial inhibition occurred using a ratio I/E ≤ 10 plots of enzyme velocity as a function of inhibitor,  
517 concentrations were fitted by nonlinear regression analysis to the Morrison equation for tight-binding  
518 inhibitors. If inhibition occurred only at I/E > 10, plots of enzyme velocity as a function of substrate  
519 concentration at several inhibitor concentrations were fitted by nonlinear regression to equations  
520 describing different models of reversible inhibition (competitive, uncompetitive, non-competitive, and  
521 mixed model). The preferred model was used for  $K_i$  determination.  $K_i$  was calculated from at least three  
522 independent experiments (mean ± SD). The maximum concentration of compounds used for the assays  
523 was 10 μM.

524  
525 **SARS-CoV-2 infection in human biopsy-derived colonoid monolayers.** Intestinal biopsy-derived  
526 colonoids from healthy donors were obtained from the Johns Hopkins Conte Digestive Disease Basic and  
527 Translational Research Core Center (NIH NIDDK P30-DK089502) and grown according to Staab *et al.*  
528<sup>37</sup>. Briefly, human colonoid monolayers were generated by combining the colonoids from one Matrigel  
529 dome (~100 or more colonoids in a 25 μL dome). Domes were dislodged with a cell scraper in 1 mL of

530 Cultrex Organoid Harvesting solution (Bio-technie, R&D Systems brand, 3700-100-01) and incubated for  
531 1 hr at 4°C on a shaker at 250 rpm. After incubation, cells were diluted with an equal volume of complete  
532 media without growth factors CMGF (Advanced DMEM/F-12 (Gibco brand, Thermo Fisher Scientific  
533 123634010), 10 mM HEPES (Invitrogen 15630-080), GlutaMAX (Gibco brand, 35050-061), and 100  
534 U/mL of penicillin-streptomycin (Gibco brand, 15140-122)), and then centrifuged at 400 x g for 10 min at  
535 4°C. Cells were resuspended in 50 µL/well of TrypLE Express (Invitrogen, 12604021) and then incubated  
536 for 1 min at 37°C. Following incubation, 10 mL of cold CMGF was added and the cells were pelleted by  
537 centrifugation as above and then resuspended in 100 µL per well of monolayer media (IntestiCult™  
538 Organoid Growth Medium (Human) 06010), 10 µM of Rho Kinase inhibitor, Y-27632 (Stemcell 72304),  
539 and 50 µg/mL of gentamicin (Gibco brand, Thermo Fisher Scientific, 1510064)), and then seeded at a 1:4  
540 dome-to-well ratio in a 96-well plate coated in 100 µL of 34 µg/mL human collagen IV (Sigma C5533).  
541 Cells were fed every two days and were used for experiments after they were fully confluent (4-5 days).  
542 Cells were treated with compounds for three hr prior to SARS-CoV-2 infection (MOI ≈ 1) for 72 hrs and  
543 then were fixed and stained for nucleocapsid and dsRNA as described in Sections 4.5 and 4.6.  
544 Quantification was performed as described in Section 4.7. Imaging was performed on the EVOS M7000  
545 microscope using the following channels: 357/447nm for nuclear staining (Hoechst 33342), 470/525nm  
546 for dsRNA (Alexa Fluor 488), and 531/593nm for nucleocapsid (Alexa Fluor 555).

547

548 **SARS-CoV-2 infection and treatment in mice.** Animal studies were carried out in accordance with the  
549 recommendations in the *Guide for the Care and Use of Laboratory Animals* of the National Institutes of  
550 Health. All protocols were performed under approved BSL-3 conditions and approved by the Institutional  
551 Animal Care and Use Committee at Cornell University (IACUC mouse protocol # 2017-0108 and BSL3  
552 IBC # MUA-16371-1). Intranasal virus and antiviral treatments were performed under anesthesia, and all  
553 efforts were made to minimize animal suffering. Eight-week-old heterozygous K18-hACE2 c57BL/6J  
554 mice (strain: 2B6.Cg-Tg(K18-hACE2)2Prlmn/J)<sup>42,59,60</sup> were used for this study (Jackson Laboratory, Bar  
555 Harbor, ME). Mice were intranasally inoculated with 1x10<sup>3</sup> PFU/animal using passage 1 of virus  
556 propagated in Vero E6 cells from isolate USA-WA1/2020 (BEI resources; NR-52281). Mice were housed  
557 five per cage and fed a standard chow diet. Daily treatments were administered intranasally at 7.2 mg/kg  
558 using the average weights of each group separated by sex from 1) day -1 to day 6 relative to infection  
559 (total of eight treatments) or 2) from day -1 to day 2 relative to infection (total of four treatments). Mice  
560 were monitored and weighed daily and euthanized at predetermined criteria for humane euthanasia  
561 following approved protocols, generally when weight loss reached 20% from day of challenge or mice  
562 became moribund with a clinical score >3 on a 5-point scale<sup>61</sup>.

563

564 **Mice histopathology.** For histologic examination, mouse lungs and brains were collected directly after  
565 euthanasia and placed in 10% formalin for >72 hrs after which tissues were embedded in paraffin. Tissue  
566 sections (4  $\mu\text{m}$ ) were analyzed after staining with H&E and scored blinded by an anatomic pathologist.  
567 For lung, scores were applied based on the percentage of each tissue type (alveolus, vessels, etc.) affected  
568 using the following criteria: (0) normal; (1) <10% affected; (2) 10-25% affected; (3) 26-50% affected;  
569 and (4) >50% affected. For brains, histologic scoring was assessed for perivascular inflammation using  
570 the most severely affected vessel and the following criteria: (0) no perivascular inflammation; (1)  
571 incomplete cuff one cell layer thick; (2) complete cuff one cell layer thick; (3) complete cuff two to three  
572 cells thick; and (4) complete cuff four or more cells thick. Necrotic cells in the neuroparenchyma were  
573 assessed per 0.237  $\text{mm}^2$  field using the most severely affected area and the following criteria: (0) no  
574 necrotic cells; (1) rare individual necrotic cells; (2) fewer than 10 necrotic cells; (3) 11 to 25 necrotic  
575 cells; (4) 26 to 50 necrotic cells; and (5) greater than 50 cells.

576 To detect viral antigen, sections were labeled with anti-SARS-CoV-2 nucleocapsid protein rabbit  
577 IgG monoclonal antibody (GeneTex; GTX635679) at 1:5000 dilution and processed using a Leica Bond  
578 Max automated IHC stainer. Leica Bond Polymer Refine Detection (Leica; DS9800) with DAB was used  
579 as the chromogen. Image acquisition was performed using a Roche Ventana DP200 slide scanner. Digital  
580 image analysis was performed using QuPath software version 0.2.3<sup>62,63</sup>. Tissues were annotated to  
581 include all available lung tissue or all brain tissue excluding cerebellum, as cerebellar tissue was not  
582 available for all mice. Following annotation, automated detection was performed using automated SLIC  
583 superpixel segmentation with a DAB mean detection threshold of 0.18892.

584

585

586

587

588

589 **References**

590

- 591 1. Edara, V. V. *et al.* Infection and vaccine-induced antibody binding and neutralization of the  
592 B.1.351 SARS-CoV-2 variant. *Cell Host Microbe* (2021) doi:10.1016/j.chom.2021.03.009.
- 593 2. Hacısuleyman, E. *et al.* Vaccine Breakthrough Infections with SARS-CoV-2 Variants. *N. Engl. J.*  
594 *Med.* NEJMoa2105000 (2021) doi:10.1056/NEJMoa2105000.
- 595 3. Shang, J. *et al.* Cell entry mechanisms of SARS-CoV-2. *PNAS* **117**, 11727–11734 (2020).
- 596 4. Hoffmann, M. *et al.* SARS-CoV-2 Cell Entry Depends on ACE2 and TMPRSS2 and Is Blocked  
597 by a Clinically Proven Protease Inhibitor. *Cell* **181**, 271-280.e8 (2020).
- 598 5. Wong, J. P. & Damania, B. SARS-CoV-2 dependence on host pathways. *Science* **371**, 884–885  
599 (2021).
- 600 6. Chitalia, V. C. & Munawar, A. H. A painful lesson from the COVID-19 pandemic: the need for  
601 broad-spectrum, host-directed antivirals. *J. Transl. Med.* **18**, 390 (2020).
- 602 7. Peacock, T. P., Goldhill, D. H., Zhou, J., Baillon, L. & Frise, R. The furin cleavage site in the  
603 SARS-CoV-2 spike protein is required for transmission in ferrets. *Nat. Microbiol.* (2021)  
604 doi:10.1038/s41564-021-00908-w.
- 605 8. Rees, W. D. *et al.* Enteroids Derived From Inflammatory Bowel Disease Patients Display  
606 Dysregulated Endoplasmic Reticulum Stress Pathways, Leading to Differential Inflammatory  
607 Responses and Dendritic Cell Maturation. *J. Crohn's Colitis* **14**, 948–961 (2020).
- 608 9. Zhou, P. *et al.* A pneumonia outbreak associated with a new coronavirus of probable bat origin.  
609 *Nature* **579**, 270–273 (2020).
- 610 10. COVID-19 Dashboard by the Center for Systems Science and Engineering (CSSE) at Johns  
611 Hopkins University. <https://coronavirus.jhu.edu/map.html>.
- 612 11. Gómez, C. E., Perdiguero, B. & Esteban, M. Emerging sars-cov-2 variants and impact in global  
613 vaccination programs against sars-cov-2/covid-19. *Vaccines* **9**, 1–13 (2021).
- 614 12. Plante, J. A. *et al.* The variant gambit: COVID-19's next move. *Cell Host Microbe* **29**, 508–515  
615 (2021).

- 616 13. Hoffmann, M. *et al.* SARS-CoV-2 variants B.1.351 and P.1 escape from neutralizing antibodies.  
617 *Cell* **184**, 1–10 (2021).
- 618 14. Murgolo, N. *et al.* SARS-CoV-2 tropism, entry, replication, and propagation: Considerations for  
619 drug discovery and development. *PLoS Pathog.* **17**, e1009225 (2021).
- 620 15. Shagufta & Ahmad, I. The race to treat COVID-19: Potential therapeutic agents for the prevention  
621 and treatment of SARS-CoV-2. *Eur. J. Med. Chem.* **213**, 113157 (2021).
- 622 16. Beigel, J. H. *et al.* Remdesivir for the Treatment of Covid-19 — Final Report. *N. Engl. J. Med.*  
623 **383**, 1813–1826 (2020).
- 624 17. Kocic, G. *et al.* Mechanism of SARS-CoV-2 polymerase stalling by remdesivir. *Nat. Commun.* **12**,  
625 (2021).
- 626 18. STUDY OF PF-07321332 IN HEALTHY PARTICIPANTS - Full Text View - ClinicalTrials.gov.  
627 <https://clinicaltrials.gov/ct2/show/NCT04756531>.
- 628 19. Gunst, J. D. *et al.* Efficacy of the TMPRSS2 inhibitor camostat mesilate in patients hospitalized  
629 with Covid-19-a double-blind randomized controlled trial. *EClinicalMedicine* **0**, 100849 (2021).
- 630 20. Rathnasinghe, R. *et al.* Comparison of transgenic and adenovirus hACE2 mouse models for  
631 SARS-CoV-2 infection. *Emerg. Microbes Infect.* **9**, 2433–2445 (2020).
- 632 21. White, K. M. *et al.* Plitidepsin has potent preclinical efficacy against SARS-CoV-2 by targeting  
633 the host protein eEF1A. *Science (80-. )*. **371**, 926–931 (2021).
- 634 22. Cáceres, C. J. *et al.* Efficacy of GC-376 against SARS-CoV-2 virus 1 infection in the K18 hACE2  
635 transgenic mouse model 2 3. doi:10.1101/2021.01.27.428428.
- 636 23. Dampalla, C. S. *et al.* Post-infection treatment with a protease inhibitor increases survival of mice  
637 with a fatal SARS-CoV-2 infection. *bioRxiv* doi:10.1101/2021.02.05.429937.
- 638 24. Hoffmann, M., Kleine-Weber, H. & Pöhlmann, S. A Multibasic Cleavage Site in the Spike Protein  
639 of SARS-CoV-2 Is Essential for Infection of Human Lung Cells. *Mol. Cell* **78**, 779-784.e5 (2020).
- 640 25. Tang, T. *et al.* Proteolytic Activation of SARS-CoV-2 Spike at the S1/S2 Boundary: Potential  
641 Role of Proteases beyond Furin. *ACS Infect. Dis.* **7**, 264–272 (2021).

- 642 26. Hoffmann, M. *et al.* Camostat mesylate inhibits SARS-CoV-2 activation by TMPRSS2-related  
643 proteases and its metabolite GBPA exerts antiviral activity. *EBioMedicine* **000**, 103255 (2021).
- 644 27. Colombo, É. *et al.* Design and synthesis of potent, selective inhibitors of matriptase. *ACS Med.*  
645 *Chem. Lett.* **3**, 530–534 (2012).
- 646 28. Beaulieu, A. *et al.* Matriptase Proteolytically Activates Influenza Virus and Promotes Multicycle  
647 Replication in the Human Airway Epithelium. *J. Virol.* **87**, 4237–4251 (2013).
- 648 29. St-Georges, C. *et al.* Modulating the selectivity of matriptase-2 inhibitors with unnatural amino  
649 acids. *Eur. J. Med. Chem.* **129**, 110–123 (2017).
- 650 30. Murza, A. *et al.* Inhibitors of type II transmembrane serine proteases in the treatment of diseases  
651 of the respiratory tract—A review of patent literature. *Expert Opin. Ther. Pat.* **30**, 807–824 (2020).
- 652 31. Shrimp, J. H. *et al.* An Enzymatic TMPRSS2 Assay for Assessment of Clinical Candidates and  
653 Discovery of Inhibitors as Potential Treatment of COVID-19. *ACS Pharmacol. Transl. Sci.* **3**,  
654 997–1007 (2020).
- 655 32. Kawase, M., Shirato, K., van der Hoek, L., Taguchi, F. & Matsuyama, S. Simultaneous Treatment  
656 of Human Bronchial Epithelial Cells with Serine and Cysteine Protease Inhibitors Prevents Severe  
657 Acute Respiratory Syndrome Coronavirus Entry. *J. Virol.* **86**, 6537–6545 (2012).
- 658 33. Béliveau, F. *et al.* Discovery and Development of TMPRSS6 Inhibitors Modulating Hepcidin  
659 Levels in Human Hepatocytes. *Cell Chem. Biol.* **26**, 1559-1572.e9 (2019).
- 660 34. Long, R. K. M. *et al.* Super resolution microscopy and deep learning identify Zika virus  
661 reorganization of the endoplasmic reticulum. *Sci. Rep.* **10**, 1–18 (2020).
- 662 35. Hartenian, E. *et al.* The molecular virology of coronaviruses. *J. Biol. Chem.* **295**, 12910–12934  
663 (2020).
- 664 36. Shen, B. Q., Finkbeiner, W. E., Wine, J. J., Mrsny, R. J. & Widdicombe, J. H. Calu-3: A human  
665 airway epithelial cell line that shows cAMP-dependent Cl<sup>-</sup> secretion. *Am. J. Physiol. - Lung Cell.*  
666 *Mol. Physiol.* **266**, (1994).
- 667 37. Staab, J. F., Lemme-Dumit, J. M., Latanich, R., Pasetti, M. F. & Zachos, N. C. Co-Culture System  
668 of Human Enteroids/Colonoids with Innate Immune Cells. *Curr. Protoc. Immunol.* **131**, (2020).

- 669 38. Rees, W. D. *et al.* Enteroids Derived From Inflammatory Bowel Disease Patients Display  
670 Dysregulated Endoplasmic Reticulum Stress Pathways, Leading to Differential Inflammatory  
671 Responses and Dendritic Cell Maturation. *J. Crohn's Colitis* **14**, 948–961 (2020).
- 672 39. Stanifer, M. L. *et al.* Critical Role of Type III Interferon in Controlling SARS-CoV-2 Infection in  
673 Human Intestinal Epithelial Cells. *Cell Rep.* **32**, (2020).
- 674 40. Lamers, M. M. *et al.* SARS-CoV-2 productively infects human gut enterocytes. *Science* (80-. ).  
675 **369**, 50–54 (2020).
- 676 41. Winkler, E. S. *et al.* SARS-CoV-2 infection of human ACE2-transgenic mice causes severe lung  
677 inflammation and impaired function. *Nat. Immunol.* **21**, 1327–1335 (2020).
- 678 42. McCray, P. B. *et al.* Lethal Infection of K18-hACE2 Mice Infected with Severe Acute Respiratory  
679 Syndrome Coronavirus. *J. Virol.* **81**, 813–821 (2007).
- 680 43. Johansen, M. D. *et al.* Animal and translational models of SARS-CoV-2 infection and COVID-19.  
681 *Mucosal Immunol.* **13**, 877–891 (2020).
- 682 44. Laporte, M. & Naesens, L. Airway proteases: an emerging drug target for influenza and other  
683 respiratory virus infections. *Curr. Opin. Virol.* **24**, 16–24 (2017).
- 684 45. Klingenstein, M. *et al.* Evidence of SARS-CoV2 Entry Protein ACE2 in the Human Nose and  
685 Olfactory Bulb. *Cells Tissues Organs* 1–10 (2021) doi:10.1159/000513040.
- 686 46. Lukassen, S. *et al.* SARS -CoV-2 receptor ACE 2 and TMPRSS 2 are primarily expressed in  
687 bronchial transient secretory cells . *EMBO J.* **39**, (2020).
- 688 47. Hatesuer, B. *et al.* Tmprss2 Is Essential for Influenza H1N1 Virus Pathogenesis in Mice. *PLoS*  
689 *Pathog.* **9**, e1003774 (2013).
- 690 48. Westberg, M. *et al.* Rational design of a new class of protease inhibitors for the potential treatment  
691 of coronavirus diseases. *bioRxiv* 2020.09.15.275891 (2020) doi:10.1101/2020.09.15.275891.
- 692 49. Tegally, H. *et al.* Emergence of a SARS-CoV-2 variant of concern with mutations in spike  
693 glycoprotein. *Nature* **10**, 1–6 (2021).
- 694 50. Lutz, C., Maher, L., Lee, C. & Kang, W. COVID-19 preclinical models: Human angiotensin-  
695 converting enzyme 2 transgenic mice. *Hum. Genomics* **14**, 20 (2020).

- 696 51. Sun, Y. J. *et al.* Structure-based phylogeny identifies Avoralstat as a TMPRSS2 inhibitor that  
697 prevents SARS-CoV-2 infection in mice. *J. Clin. Invest.* (2021) doi:10.1172/jci147973.
- 698 52. Cornelissen, L. *et al.* Nafamostat Mesylate in lipid carrier for nasal SARS-CoV2 titer reduction in  
699 a hamster model. *bioRxiv* 2020.11.09.372375 (2020) doi:10.1101/2020.11.09.372375.
- 700 53. Corbeil, C. R., Williams, C. I. & Labute, P. Variability in docking success rates due to dataset  
701 preparation. *J. Comput. Aided. Mol. Des.* **26**, 775–786 (2012).
- 702 54. Ogando, N. S. *et al.* SARS-coronavirus-2 replication in Vero E6 cells: Replication kinetics, rapid  
703 adaptation and cytopathology. *J. Gen. Virol.* **101**, 925–940 (2020).
- 704 55. Shapira, T. *et al.* High-Content Screening of Eukaryotic Kinase Inhibitors Identify CHK2 Inhibitor  
705 Activity Against Mycobacterium tuberculosis. *Front. Microbiol.* **11**, (2020).
- 706 56. Olmstead, A. D., Knecht, W., Lazarov, I., Dixit, S. B. & Jean, F. Human Subtilase SKI-1/S1P Is a  
707 Master Regulator of the HCV Lifecycle and a Potential Host Cell Target for Developing Indirect-  
708 Acting Antiviral Agents. *PLoS Pathog.* **8**, e1002468 (2012).
- 709 57. Désilets, A., Longpré, J. M., Beaulieu, M. È. & Leduc, R. Inhibition of human matriptase by eglin  
710 c variants. *FEBS Lett.* **580**, 2227–2232 (2006).
- 711 58. Béliveau, F., Désilets, A. & Leduc, R. Probing the substrate specificities of matriptase, matriptase-  
712 2, hepsin and DESC1 with internally quenched fluorescent peptides. *FEBS J.* **276**, 2213–2226  
713 (2009).
- 714 59. Oladunni, F. S. *et al.* Lethality of SARS-CoV-2 infection in K18 human angiotensin-converting  
715 enzyme 2 transgenic mice. *Nat. Commun.* **11**, 1–17 (2020).
- 716 60. Zheng, J. *et al.* COVID-19 treatments and pathogenesis including anosmia in K18-hACE2 mice.  
717 *Nature* **589**, 603–607 (2021).
- 718 61. Burkholder, T., Foltz, C., Karlsson, E., Linton, C. G. & Smith, J. M. Health Evaluation of  
719 Experimental Laboratory Mice. *Curr. Protoc. Mouse Biol.* **2**, 145–165 (2012).
- 720 62. Achanta, R. *et al.* SLIC superpixels compared to state-of-the-art superpixel methods. *IEEE Trans.*  
721 *Pattern Anal. Mach. Intell.* **34**, 2274–2281 (2012).
- 722 63. Bankhead, P. *et al.* QuPath: Open source software for digital pathology image analysis. *Sci. Rep.*



723 7, 1–7 (2017).

724 64. Sarret, P. Éric Marsault (1971–2021): A Legacy through the Prism of Relationship Chemistry. *J.*  
725 *Med. Chem.* (2021) doi:10.1021/acs.jmedchem.1c00481.

726

727

728

## Acknowledgments

The authors acknowledge the support of the CL-3 facility (Facility for Infectious Disease and Epidemic Research (FINDER) of the Life Sciences Institute of the University of British Columbia founded by Dr. François Jean and its biosafety support staff including Dr. Bintou Ahidjo (Research Platform Manager) and T. Dean Airey (FINDER Senior Research Technician). We thank the LSI imaging facility of the Life Sciences Institute of the University of British Columbia funded by the Canadian Foundation of Innovation and BC Knowledge Development Fund as well as a Strategic Investment Fund (Faculty of Medicine, University of British Columbia). We further thank Dr. Alex Ball, Jr., MD, Senior Scientist (Genetex), for supplying the SARS-CoV-2 (COVID-19) nucleocapsid antibody [HL344] (GTX635679). We also thank Dr. Samira Mubareka, (Sunnybrook Health Sciences Centre and Research Institute, University of Toronto) for providing the SARS-CoV-2 (SARS-COV-2/Canada/VIDO-01/2020) and Dr. Martin Petric, Samantha Kaweski, Dr. Paul Levett, and Dr. Mel Kraiden (BC Centre for Disease Control, BC, Canada) for isolating and providing the SARS-CoV-2 VOCs (B.1.1.7 and B.1.351). We also acknowledge a generous donation towards the purchase of the Cell-Insight CX7 HCS system provided by the Vancouver General Hospital Foundation to Dr. Jean. The authors also acknowledge the support of the Cornell BSL-3, animal, and biosafety support staff and the Avery August lab for their tremendous support in setting up the animal studies, including but not limited to Julie Sahler, Amie L. Redko, Nicole Kushner, Paul Jennette, Joshua Turse, Bhupinder Singh, Donna Miller, David G. Collins, Timothy Lynn Van Deusen. The authors acknowledge the support of NEOMED/adMare in the early phases of developing host-based antivirals. We also acknowledge Marco Straus and Derek Wei for help with screening pseudoparticles. We also acknowledge Eloic Colombo and Baptiste Plancq for the synthesis of some intermediates, analogs, and warhead. We also thank Dr. Jill Kelly for proofreading of the manuscript. We thank Dr. Nicholas Zachos from John Hopkins University for kindly providing human colonoids and also to the patients who donated these samples for research. The authors dedicate this work to the memory of Professor Eric Marsault<sup>64</sup> (DOI: 10.1021/acs.jmedchem.1c00481).

## **Funding:**

This work was supported by operating grants from the Canadian 2019 Novel Coronavirus (COVID-19) Rapid Research Funding program of the Canadian Institutes of Health Research (CIHR) [UBR 322812; VR3-172639 (RL, PLB and FJ) and OV3-170342 (FJ)]; by a Genome British Columbia / COVID-19 Rapid Response Funding Initiative [COV011 (FJ)] by a Cornell University Seed Grant, Cornell University start-up funds and a George Mason University, Mercatus Center; Emergent Ventures - Fast Grant (HAC); by a National Institute of Health research grant [R01AI35270 (GW)]; by a MITACS Accelerate Fellowship [IT18555 (WR)]; an NIH training grant [T32EB023860 (AA to support DWB) and R25GM125597 (AA to support BI)], by an NIH R01 [AI138570 (BI)]; a CIHR Frederick Banting and Charles Best Canada Graduate Scholarship Award [167018 (SPD)]; a PROTEO graduate scholarship (TV); and a MITACS Inc. Accelerate fellowship COVID-19 Award [IT18585 (TS)].

## **Author contributions:**

Conceptualization: FJ, RL, HCA, PLB, GRW, EM

Methodology: TS, SD, IAM, MJ, SPD, AD, TV, DB, BI, GG, AC, PLB, JS

Investigation: TS, SD, IAM, MJ, SPD, AD, TV, DB, BI, PLB

Visualization: TS, AO, GG, AC, PLB, IAM, MJ, PLB

Funding acquisition: FJ, RL, GRW, HCA, AA, EM, IRN

Project administration: AD, AO, PLB

Supervision: FJ, RL, HCA, PLB, GRW, EM, AA, IRN

Writing – original draft: AO, FJ, PLB, RL, AD, HCA, AC, IAM, MJ

Writing – review and editing: TS, GRW, RL, PLB, AD, HCA, AC, IAM, AA, MJ, IRN, AO, FJ

**Competing Interest Statement:** RL and PLB hold patent WO2012162828A1 related to peptidomimetic serine protease inhibitors. The remaining authors declare that they have no competing interests.

**Materials & Correspondence:** Correspondence and material requests related to cell-based SARS-CoV-2 studies should be addressed to Dr. François Jean, those related to peptidomimetics and *in vitro* studies should be addressed to Dr. Richard Leduc, and those related to animal studies should be addressed to Dr. Hector C. Aguilar.

## Figures and Tables

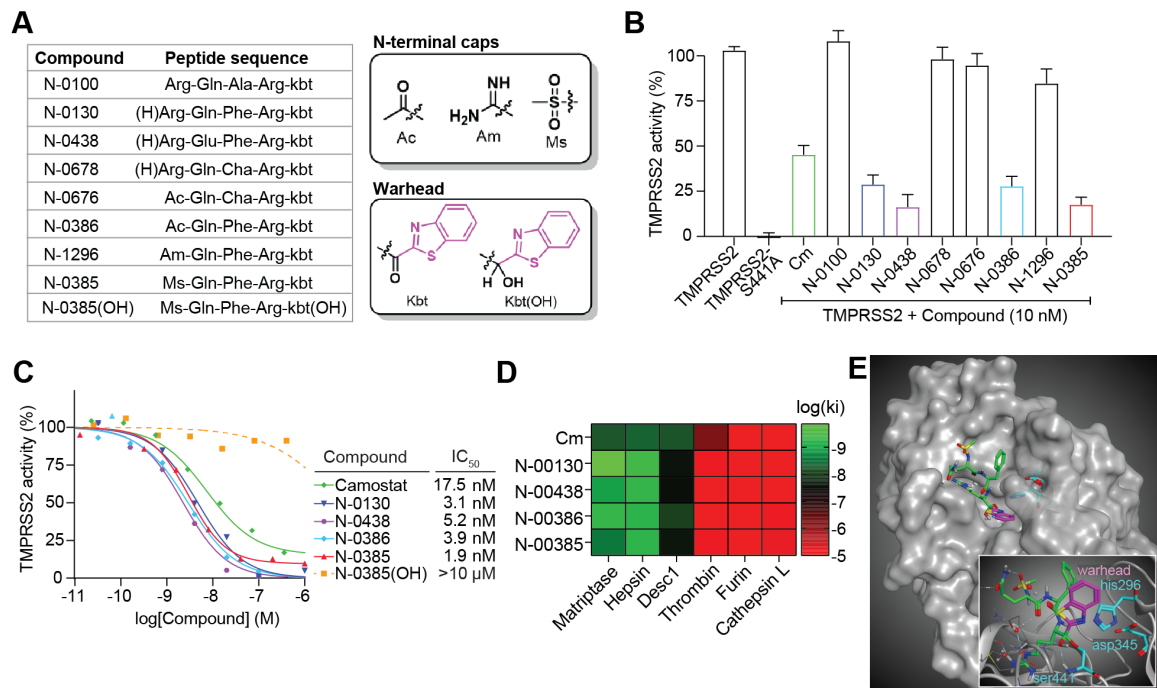

**Figure 1. Ketobenzothiazole-based small-molecule peptidomimetics are potent TMPRSS2 inhibitors.** (A) List of the peptidomimetic compounds used in this study along with their respective sequences. The structures of N-terminal caps, the ketobenzothiazole warhead, and the alcohol ketobenzothiazole are shown on the right. (B) Vero E6 cells were transfected with either an empty vector (mock), TMPRSS2 wild type (WT), or the inactive mutant TMPRSS2-S441A for 24 hr. Indicated compounds (10 nM) were added concomitantly with a fluorogenic substrate on cells for an additional 24 hr before fluorescence reading. Relative TMPRSS2 activity was measured using the mock-subtracted fluorescence and reported as the percentage of residual activity relative to the saline-treated cells (0.01% DMSO).  $n = 3$ . (C) Dose-response curves were generated for the indicated compounds ( $n \geq 3$ ) using the assay described in (A) and IC<sub>50</sub> values were determined using nonlinear regression analysis. Representative IC<sub>50</sub> curves are shown. (D) Specificity of selected compounds toward other serine proteases are shown. Data are represented as log ( $K_i$ ),  $n \geq 3$  and represented as a heat map. (E) Large: Docking of N-0385 (green, warhead in purple) in the binding pocket of TMPRSS2 (homology model). Residues of the catalytic triad are shown in cyan. Small: Interaction of N-0385 with TMPRSS2 residues. N-0385 forms a covalent bond with catalytic triad residue Ser441.

(H)Arg = desamino arginine, Ac = acetyl, Am = amidinyl, Ms = mesyl, kbt = ketobenzothiazol,  
Cm = camostat mesylate, Cha = cyclohexylalanine

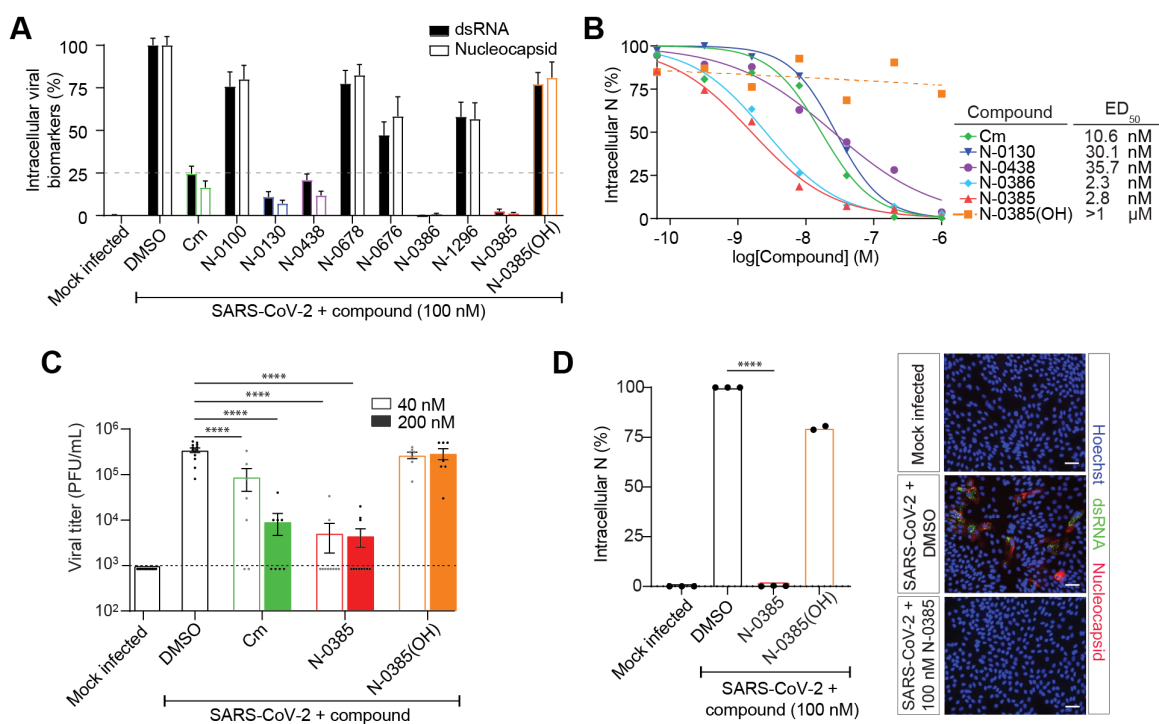

**Figure 2. Small-molecule peptidomimetics active against TMPRSS2 are potent low nanomolar inhibitors of SARS-CoV-2 in a human lung epithelial cell line and in human colonoids.** (A) Calu-3 cells were pretreated with 100 nM of the indicated compounds followed by SARS-CoV-2 infection (MOI = 2). Intracellular infection levels were evaluated by high-content screening of cell nuclei, dsRNA, and nucleocapsid and then quantified relative to DMSO-treated cells. (nucleocapsid, n = 3; dsRNA, n = 2); significant nucleocapsid comparisons: \*\*\*\* (modified p <0.0001) Cm, N-0130, N-0438, N-0676, N-0386, N-1296, and N-0385; significant dsRNA comparisons: \* (modified p <0.05) N-1296, \*\*\* (modified p <0.0005) N-0676, \*\*\*\* Cm, N-0130, N-0438, N-0386, and N-0385. (B) Dose response curves were generated for the lead antiviral peptidomimetic compounds in Calu-3 cells using nucleocapsid staining of compound pretreated and infected cells (n: Cm = 5, N-0130 = 5, N-0438 = 3, N-0386 = 4, N-0385 = 8, N-0385(OH) = 5). \*\*\*\* (modified p <0.0001). (C) Plaque assays were performed using two of the experimental conditions evaluated in the dose response analysis (40 nM and 200 nM) to determine the viral titers (amount of infectious virus) produced in cells pretreated with the indicated compounds prior to infection (n = 3); dotted line represents limit of detection. \*\*\*\* (modified p <0.0001). (D) Colonoids were pretreated with 100 nM of the indicated compounds and infected with SARS-CoV-2 (MOI ≈ 1). The impact on intracellular infection levels was determined by relative quantification of nucleocapsid staining. Representative fluorescent images

of colonoids subjected to the indicated treatments are shown (Hoechst in blue, nucleocapsid in red, and dsRNA in green). Scale bars 50  $\mu\text{m}$ . (N-0385, n = 3; N-038(OH), n = 2); \*\*\*\* modified p <0.0001. One-way ANOVA with Bonferroni correction was used to determine significance in (A), (C), and (E). Error bars represent standard error of the mean.

Cm = camostat mesylate, N = nucleocapsid, PFU = plaque-forming units, MOI = multiplicity of infection



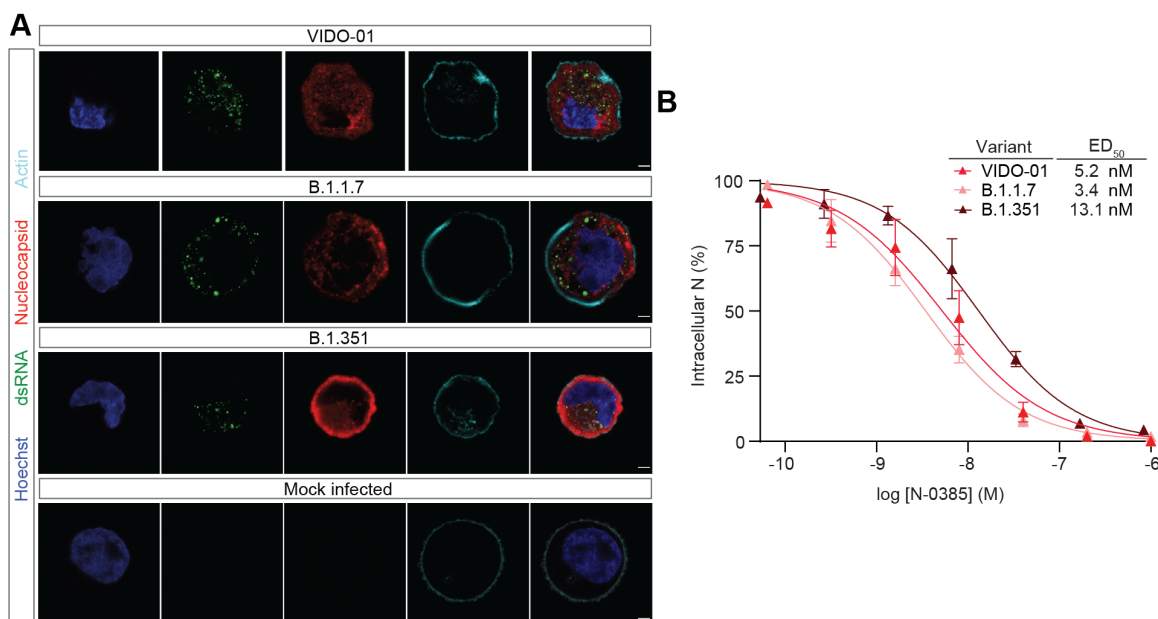

**Figure 3. N-0385 is a nanomolar broad-spectrum coronavirus inhibitor of SARS-CoV-2 variants of concern (VOCs).** (A) Representative fluorescent images of SARS-CoV-2-infected Calu-3 cells. Calu-3 cells infected with the indicated SARS-CoV-2 variants and mock infected are shown. Scale bar: 5  $\mu$ m. Hoechst is shown in blue, nucleocapsid in red, dsRNA in green, and actin in cyan. Images captured with a Leica TCS SP8 3 $\times$  STED microscope. (B) Dose response curves were generated for N-0385 in Calu-3 cells using nucleocapsid staining of N-0385 pretreated cells infected with the indicated VOCs (n = 3). The significant difference between the dose response curves for B.1.1.7 and B.1.351 compared to the VIDO-01 isolate was assessed using repeated measures ANOVA with concentration as a random factor. Tukey's post hoc analysis was used to test pair-wise comparisons. There was a significant main effect of the variant on the dose response curves ( $F = 7.0708$ ,  $p = 0.0099$ ). Post hoc analysis showed that the dose response curve for the B.1.351 variant, but not the B.1.1.7 variant, was significantly different from the VIDO-01 ( $p=0.0301$ ) isolate.

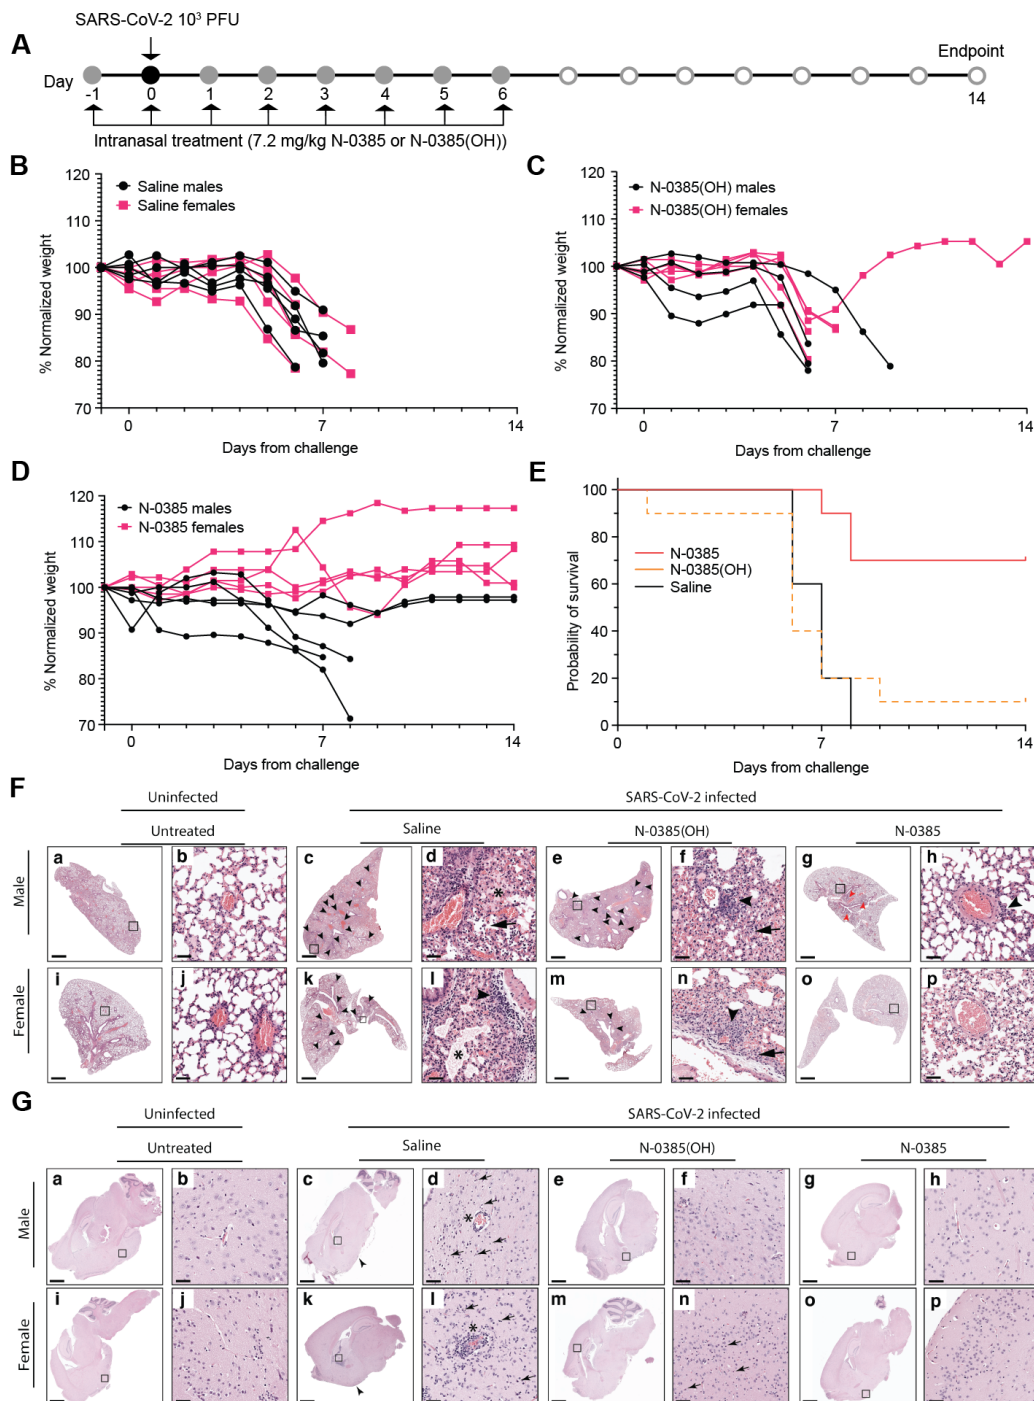

**Figure 4. N-0385 reduces morbidity and mortality in a K18-hACE2 mice model of SARS-CoV-2 disease.** (A) K18-hACE2 mice were treated once daily on day -1 to day 6 relative to SARS-CoV-2 infection and surviving mice were terminated on day 14. (B) Weight change of saline control-treated mice. (C) Weight change of N-0385(OH)-treated mice. (D) Weight change

of N-0385-treated mice. **(E)** Survival graph. **(F)** Representative H&E images of lung histopathology in male (**top row**) and female (**bottom row**) mice without treatment (**a, b, i, j**) and treated with saline, N-0385(OH), or N-0385 (**c-h, k-p**). Uninfected K18 mice without treatment (**a, b, i, j**) were normal. Mice infected with SARS-CoV-2 (**c-h, k-p**) frequently developed small perivascular infiltrates of inflammatory cells (**arrowhead**). Severe inflammatory changes including alveolar fibrin and edema (**asterisk**) were present only in mice treated with saline (**c, d, k, l**). Perivascular inflammatory cell infiltrates (**arrowhead**) were more widespread in mice treated with saline (**c, k**) and N-0385(OH) (**e, m**) compared to mice treated with N-0385 (**g, o**). Mice treated with N-0385 that survived to the study endpoint (**g, h, o, p**) had smaller and fewer perivascular inflammatory infiltrates (**arrowhead**) and occasional type II pneumocyte hyperplasia (**red arrow**). **(G)** Representative H&E images of brain histopathology in male (**top row**) and female (**bottom row**) mice without treatment (**a, b, i, j**) and treated with saline, N-0385(OH), or N-0385 (**c-h, k-p**). Mice treated with saline and infected with SARS-CoV-2 (**c, d, k, l**) developed perivascular cuffs of inflammatory cells (**asterisk**), necrotic neurons (**arrow**), gliosis, and meningeal infiltrates (**arrowhead**). CNS lesions were reduced in mice treated with N-0385(OH) (**e, f, m, n**) and absent in mice treated with N-0385 that survived to the study endpoint (**g, h, o, p**). Magnified areas were selected to best represent the presence of inflammatory cells and pathological changes. Scale bar: **a, c, e, g, i, k, m, o** = 1 mm; **b, d, f, h, j, l, n, p** = 50  $\mu$ m.

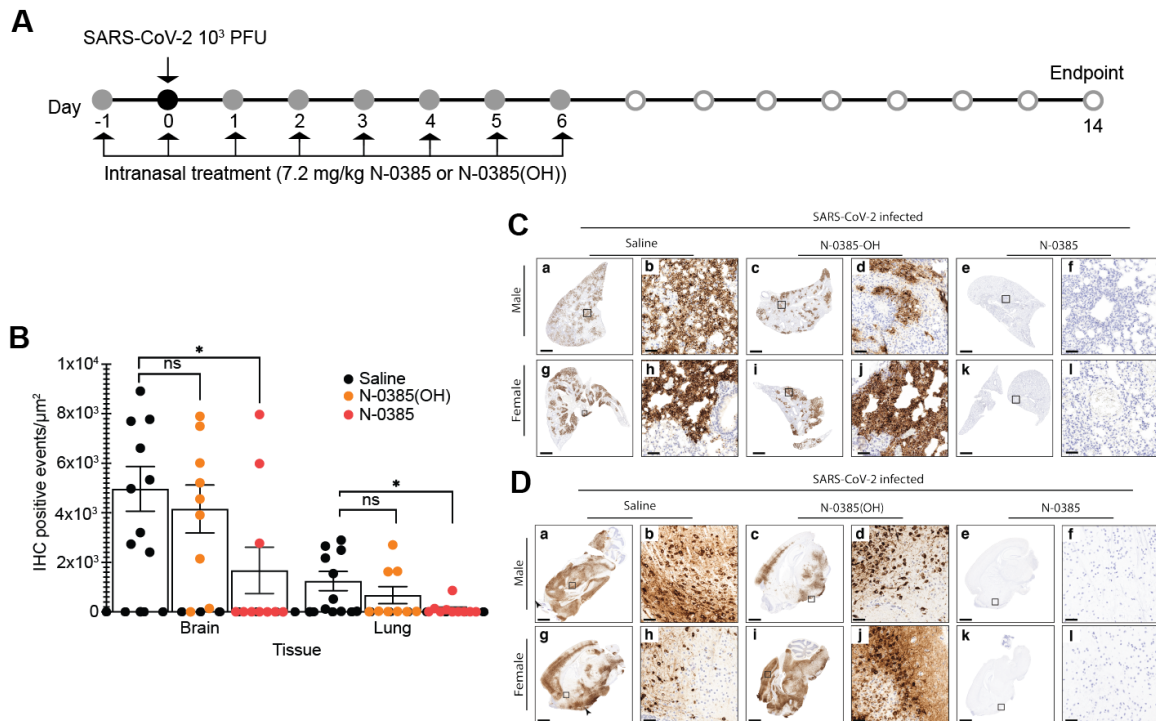

**Figure 5. N-0385 drastically reduces SARS-CoV-2 in the lungs of mice treated with N-0385 as demonstrated by immunohistochemistry.** (A) K18-hACE2 mice were treated once daily on day -1 to day 6 relative to SARS-CoV-2 infection and surviving mice were terminated on day 14. (B) Graph showing number of cells/ $\mu\text{m}^2$  that were positive for SARS-CoV-2 nucleocapsid by immunohistochemistry staining; reduction in positive cells was significantly greater for the N-0385 vs saline control while N-0385(OH) was not significantly different from the saline-treated group; \* modified  $p < 0.05$ . One-way ANOVA with a Bonferroni used to determine significance. Error bars indicate standard deviations. (C) Representative immunohistochemistry sections of SARS-CoV-2 nucleocapsid in the lungs of the SARS-CoV-2 infected male (**top row**) and female (**bottom row**) mice from Figure 3F (**a, b, g, h**). Mice treated with saline had significant immunoreactivity against SARS-CoV-2 throughout the lung. A similar pattern of patchy infection was present in mice treated with N-0385(OH) (**c, d**) but was not significant in all mice (**i, j**). Immunoreactivity for SARS-CoV-2 was rare to absent in mice that survived to the study endpoint (**e, f, k, l**). (D) Representative immunohistochemistry sections of the SARS-CoV-2 nucleocapsid in brains of SARS-CoV-2 infected male (**top row**) and female (**bottom row**) mice from Figure 3G (**a-d, g-j**). Mice treated with saline or N-0385(OH) often had significant positive immunoreactivity in neurons throughout the brain (**e, f, k, l**). Immunoreactivity for SARS-CoV-2

was rare to absent in mice that survived to the study endpoint. SARS-CoV-2 nucleocapsid. Scale bar: **a, c, e, g, i, k** = 1 mm; **b, d, f, h, j, l** = 50  $\mu$ m.

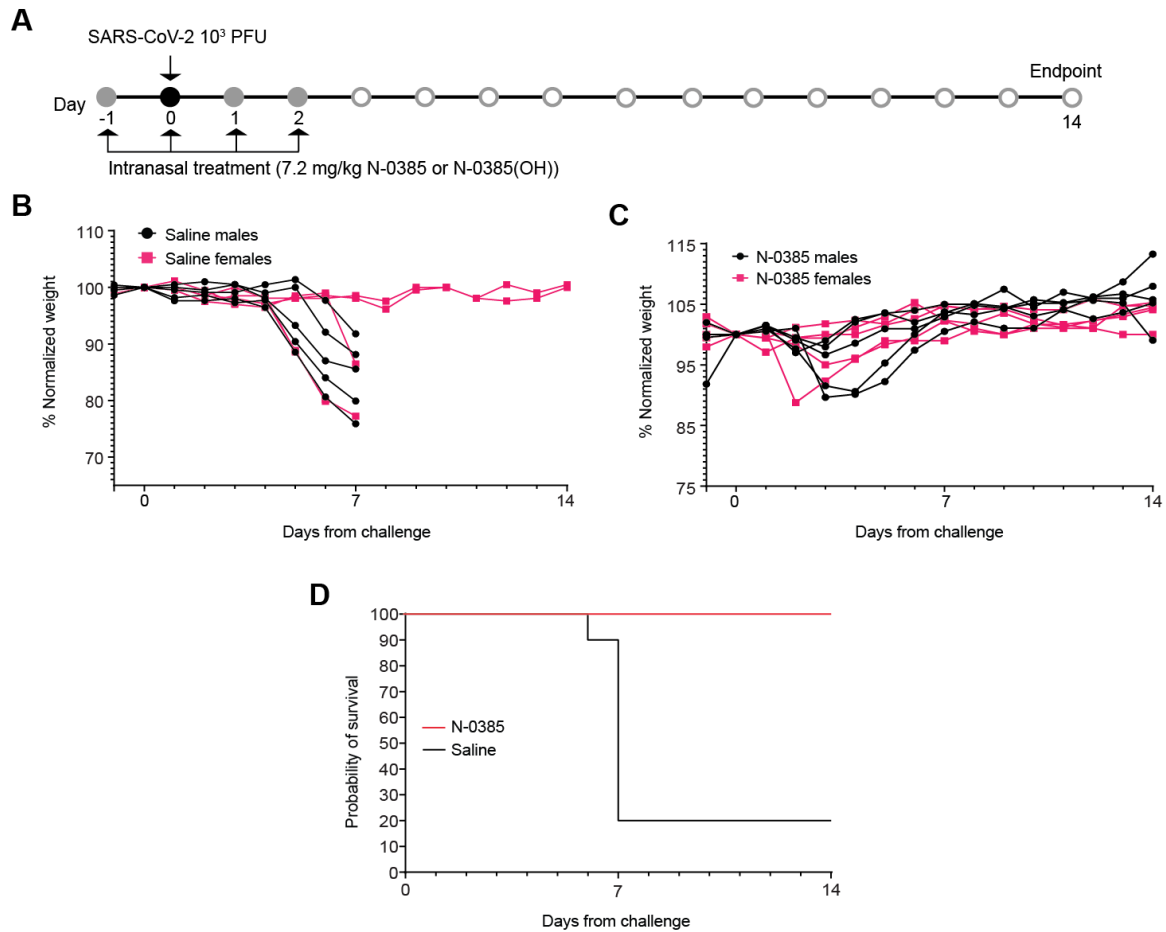

**Figure 6. N-0385 reduces weight loss and completely prevents mortality in a K18-hACE2 mice model of SARS-CoV-2 disease following an early 4-day treatment regimen (A)** K18-hACE2 mice were treated once daily on day -1 to day 2 relative to SARS-CoV-2 infection and surviving mice were terminated on day 14. **(B)** Weight change of saline control-treated mice. **(C)** Weight change of N-0385-treated mice. **(D)** Survival graph.

PFU = plaque-forming units
